# NATIONAL LAB INTERNSHIP IMPACTS ON COMMUNITY COLLEGE STUDENT SUCCESS

**Title:** “When I talk about it, my eyes light up!” Impacts of a national laboratory internship on community college student success

## Authors:

Laleh E. Coté\*, Lawrence Berkeley National Laboratory, <https://orcid.org/0000-0002-6232-7573>

Seth Van Doren, University of California, Irvine, <https://orcid.org/0000-0003-0674-277X>

Astrid N. Zamora, Stanford University, <https://orcid.org/0000-0001-8187-3492>

Julio Jaramillo Salcido, Lawrence Berkeley National Laboratory, <https://orcid.org/0000-0002-4113-5345>

Esther W. Law, Milliman, Inc.

Gabriel Otero Munoz, Indiana University Bloomington, <https://orcid.org/0000-0002-1444-8020>

Aparna Manocha, University of California, San Francisco, <https://orcid.org/0000-0001-7824-9971>

Colette L. Flood, Lawrence Berkeley National Laboratory, <https://orcid.org/0000-0002-8674-0872>

Anne M. Baranger, University of California, Berkeley, <https://orcid.org/0000-0002-1973-4632>

## \*Corresponding author:

Laleh E. Coté

Workforce Development & Education

Lawrence Berkeley National Laboratory

1 Cyclotron Road Mailstop 50A1148

Berkeley, CA 94720

Email: LECote@lbl.gov

# NATIONAL LAB INTERNSHIP IMPACTS ON COMMUNITY COLLEGE STUDENT SUCCESS

## Abstract

Participation in research experiences and internships may improve graduation rates and persistence in science, technology, engineering, and mathematics (STEM) among undergraduates, yet very little is known about the benefits of these activities for community college students. To fill this gap, we collected survey and interview data from 43 individuals who completed the Community College Internship (CCI) at Lawrence Berkeley National Laboratory (LBNL). These “CCI alumni” reported gains, including: connections with members of the LBNL community (95%); higher expectations of academic or career success (91%); development of critical skills (88%); and increased self-efficacy and/or confidence (84%), STEM identity (70%), and knowledge about STEM careers (65%). Of this group, 12% are graduate students, 84% have entered the STEM workforce, and 5% have entered the health workforce. We hope this work will encourage other scholars to contribute to what is known about the impact of internships at national laboratories on STEM majors. (149 words)

**Keywords:** Science Education, Community College, Higher Education, Career Development, Engineering Education, Latino/a

**Additional keywords:** Social Cognitive Career Theory (SCCT), National Laboratories, Culture, Identity, Internship, Undergraduate Research Experiences, Qualitative Research, Survey Research, In-depth Interviewing, Longitudinal Studies

# NATIONAL LAB INTERNSHIP IMPACTS ON COMMUNITY COLLEGE STUDENT SUCCESS

## Introduction

National reports highlight the value of investing in science, technology, engineering, and mathematics (STEM) education to support the long-standing effort to increase the representation of women; Black, Hispanic/Latinx, and Native American people; and people with disabilities in these fields (America COMPETES Act of 2022, 2022; Hampton-Marcell et al., 2023; National Center for Science and Engineering Statistics, 2021). One component of the recent CHIPS and Science Act is to take active steps toward broadening participation in STEM disciplines, with the ultimate goal of increasing diversity across the workforce (CHIPS Act of 2022, 2022). To promote diversity, equity, inclusion, and accessibility across their large suite of programs, the United States (U.S.) Department of Energy (DOE) Office of Science recently implemented the Reaching a New Energy Sciences Workforce (RENEW) initiative, the Promoting Inclusive and Equitable Research (PIER) component of research proposals, and other related efforts (DOE, 2022). The President's Council of Advisors on Science and Technology (PCAST) has called for DOE national laboratories to engage with community colleges in preparing a diverse future STEM workforce through internships and work-based learning experiences (PCAST, 2021). This is, in part, due to the fact that community college students are collectively more diverse than students attending public or private baccalaureate granting institutions, with respect to gender, race, ethnicity, neurodiversity, disability, career pathway, parental educational attainment, and socio-economic status (AACC, 2019; Jain et al., 2020; Newman et al., 2011; Provasnik & Planty, 2008; Radwin et al., 2013).

Student engagement in STEM research experiences and internships are an effective way to broaden participation and promote long-term retention in STEM (e.g., Hernandez et al., 2018; Nerio et al., 2019; Thompson et al., 2021), but we know very little about these opportunities hosted at DOE national laboratories and/or those in which community college students participate. Thus, our research team studied the experiences of community college STEM majors before, during, and after they participated in an internship at a DOE national laboratory and how they believe their experiences impacted their academic and career activities. We investigated the following research questions:

# NATIONAL LAB INTERNSHIP IMPACTS ON COMMUNITY COLLEGE STUDENT SUCCESS

RQ1: *Prior to applying to the Community College Internship (CCI) at Lawrence Berkeley National*

*Laboratory (LBNL), what were the experiences of CCI alumni when they were community college*

*students studying STEM?*

RQ2: *What skills, gains, and/or benefits do alumni of the CCI program at LBNL attribute to their*

*participation in this program?*

RQ3: *In what ways do CCI alumni believe that their backgrounds, cultures, and identities impacted their*

*experiences studying and pursuing careers in STEM?*

## Table 1

*Definition of terms used in this study*

| Term                               | Definition                                                                                                                                                                                                                                                                                                                                                                                                                             |
|------------------------------------|----------------------------------------------------------------------------------------------------------------------------------------------------------------------------------------------------------------------------------------------------------------------------------------------------------------------------------------------------------------------------------------------------------------------------------------|
| Community college                  | Accredited U.S. colleges offering associate degrees, such as the Associate of Arts (A.A.) and Associate of Science (A.S.); some offer specialized technical or vocational programs; often referred to “two-year,” “2-year,” “city,” “junior,” “local,” or “technical” colleges or schools (Ocean et al., 2022) even though many students require more or less time than two years (Complete College America, 2014; Jain et al., 2020). |
| Baccalaureate granting institution | Accredited U.S. colleges or universities offering degrees such as the Bachelor of the Arts (B.A.) and Bachelor of Science (B.S.) (Jain et al., 2020); many undergraduates attending “4-year” schools take longer than 4 years to complete their degree, transfer between schools, or transfer to a community college (Bowen et al., 2009; Complete College America, 2014; Townsend & Dever, 1999).                                     |
| Transfer                           | Most common form is “vertical transfer,” when an undergraduate completes lower-division coursework at a U.S. community college in order to move to a baccalaureate granting institution to complete upper-division coursework and obtain a bachelor’s degree; additional forms include “horizontal transfer,” when an undergraduate moves from one baccalaureate granting institution to another (Townsend, 2001).                     |
| Graduate                           | Community college graduation refers to an undergraduate obtaining one or more associate degrees; graduating from a baccalaureate granting institution refers to obtaining one or more bachelor’s degrees.                                                                                                                                                                                                                              |

## NATIONAL LAB INTERNSHIP IMPACTS ON COMMUNITY COLLEGE STUDENT SUCCESS

### Literature review

An estimated 15-20% of community college students are interested in graduating with a STEM degree (Varty, 2022). STEM majors in the U.S. are more likely to drop out of school or switch to a non-STEM major than their peers in non-STEM disciplines, and this is still more likely for students who are Alaska Native, Black, Hispanic/Latinx, Native American, female, first-generation to college, and low-income (Anderson & Kim, 2006; Chen, 2013; Hill, Corbett, & St Rose, 2010; Griffith, 2010; Huang et al., 2000; Kokkelenberg & Sinha, 2010; Shaw & Barbuti, 2010). Approximately 75-80% of entering community college students taking STEM coursework aspire to graduate with a bachelor's degree, but only 15-16% of community college STEM majors meet this goal (CCSSE, 2021; Horn & Skomsvold, 2011; Juskiewicz, 2016; Sansing-Helton et al., 2021; NCES, 2019).

Multiple scholars argue that Black and Hispanic/Latinx students and professionals do not receive adequate support needed to obtain their academic/career goals, and call for additional research on the subject (Carales & López, 2020; García & Garza, 2016; Gaxiola Serrano, 2017; Ornelas & Solorzano, 2004; Singleton et al., 2021). Low levels of psychosocial constructs (e.g., STEM identity, confidence) are thought to be important to understanding the low graduation rates and STEM persistence of Black and Hispanic/Latinx undergraduates (Bottia et al., 2021). Thus, it is critical to explore those factors that contribute to student persistence in STEM and determine what encourages a student to “stay?”

Undergraduates are greatly influenced by the activities they engage in during the first two years of their college experience, but many undergraduates do not participate in STEM technical work or research until the last two years of their bachelor's degree (PCAST, 2012; Russell et al., 2007). Aptly stated by Hagedorn and Purnamasari (2012), a student “will not elect to be a nuclear physicist” without some exposure to the field, or knowledge about what the career path entails; participation in research experiences or internships can offer this to students. Due to the potential benefits of STEM research experiences and internships, many studies are published each year on the subject. However, although nearly 50% of people with STEM bachelor's or master's degrees attended a U.S. community college, an estimated 6% (or fewer) of the studies published each year about STEM research experiences and

# NATIONAL LAB INTERNSHIP IMPACTS ON COMMUNITY COLLEGE STUDENT SUCCESS

internships include data from community college or transfer students (Creech et al., 2022; Krim et al., 2019; Lucero et al., 2021; Linn et al., 2015; Mooney & Foley, 2011; NASEM 2017; NSF, 2012; Tsapogas, 2004; Tuthill & Berestecky, 2017). There are some examples of programs designed for community college students that report positive outcomes (e.g., Ashcroft et al., 2021; Judge et al., 2022; Nerio et al., 2019; Stofer et al., 2021; Wise-West et al., 2013), but these are rare.

With DOE national laboratories spending over \$500 million annually to provide students, postdoctoral scholars, and faculty with opportunities to work on technical/research projects, we expected to see these opportunities well represented in the research literature (DOE, 2017). In the past few decades, there have been numerous technical and meeting reports, conference papers, and abstracts published about STEM education and outreach activities at DOE national laboratories, and a small number of peer-reviewed publications on the subject (e.g., Barajas et al., 2019; Hahn et al., 2018; Kolsky, 2005; Lincoln et al., 2019; Rippey & Joseph, 2022; Russell, 2011; Sahyun et al., 2006; Wurster et al., 2005). Although researchers who collect data from people and plan to share this information through publications or presentations are required to provide evidence of review/guidance from an Institutional Review Board (IRB), we are not aware of any previously published studies that include data from program participants in DOE national laboratory programs and documentation of IRB review. This may be due to the fact that the IRB review has not taken place prior to collecting data from program participants or that this step was not documented as part of a manuscript (e.g., Beshyah et al., 2018; Taber, 2014). This is problematic because it limits a) knowledge about how these programs compare to other similar programs, b) the extent to which researchers at other institution types can find and make contributions to what is already known about these programs, and c) productive collaborations with experts at DOE national laboratories on the subject.

## Study Overview

We explored the ways in which community college students experience benefits as a direct result of participation in a STEM internship, to learn both how and why this program impacted its participants

## NATIONAL LAB INTERNSHIP IMPACTS ON COMMUNITY COLLEGE STUDENT SUCCESS

(Estrada et al., 2021). Although many quantitative studies have documented achievement levels for undergraduates across different institution types, there is a gap in knowledge about the academic trajectories and experiences of students attending U.S. community colleges and the ways in which their personal experiences have impacted their academic and career success (Crisp et al., 2016; Taylor & Jain, 2017). Informed by many studies that link psychosocial, academic, and professional benefits for students who complete STEM research experiences and internships; the lack of knowledge about the experiences of community college STEM majors; and the absence of studies documenting programs at DOE national laboratories, we considered the role of the CCI program on our study participants' academic and career activities. We gained a deep understanding of participant experiences before, during, and after participation in the program through the documentation of their experiences as students and their opinions about the factors that influenced their academic/career trajectories (including their own community, culture, and background).

We take an **asset-based (anti-deficit) approach** to studying the experiences of individuals who began their STEM coursework as community college students. Deficit thinking involves labeling certain students as being “disadvantaged” or “lacking” in some way, and can be used to justify why some students “fail to achieve” at the same levels as students in other groups (Reed, 2020; Walker, 2011). Instead, we ask questions that allow us to investigate the reasons why community college students persist in STEM, aligned with the asset-based approaches taken by other educational research studies (e.g., Martin et al., 2020; Rincón & Rodriguez, 2021; Stanton et al., 2022). If we identify the factors that have a positive influence on students, we better position ourselves to reproduce these supports in the future.

### Theoretical Framework

Adapted from the social cognitive theory described by Bandura in 1986, the **social cognitive career theory (SCCT) framework** was developed to understand how people develop their interest in a subject and make choices that ultimately impact their level of success in that field (Lent et al., 1994, 2000). The theory focuses on the relationship between certain cognitive-personal variables with the

## NATIONAL LAB INTERNSHIP IMPACTS ON COMMUNITY COLLEGE STUDENT SUCCESS

supports and barriers an individual faces, and how this relationship influences the development of their career (Lent et al., 2000). We applied SCCT to explore the impact of a particular learning experience on the academic/career trajectories of individuals who studied STEM while attending a U.S. community college (Brown & Lent, 1996; Carpi et al., 2017; Fouad & Santana, 2017). The SCCT model heavily weighs an individual's belief in their ability to be successful in/on a given subject/task (self-efficacy) on their actual success in/on that subject/task and proposes a connection between student experiences and perspectives about their future career. Another component of this model are outcome expectations, individual "beliefs about the consequences or outcomes of performing particular behaviors" (Lent & Brown, 2006). Studies suggest that academic and/or career-related outcome expectations may be a powerful influence over student behavior, even in the face of contextual factors (e.g., discrimination, lack of role models) that can be barriers to success (Byars & Hackett, 1998; Lent et al., 2005). This connection is aligned with previous studies using SCCT to understand the impact of research experiences on STEM persistence (e.g., Burton et al., 2019; Frantz et al., 2017).

We hypothesize that a STEM internship for community college students can serve as a learning experience aligned with the SCCT model, and elements such as interactions with mentors and role models can serve as contextual factors. Completing an internship could therefore influence the interests, goals, and behaviors of community college students, related to their academic and career trajectories. Although it is only one of many possible factors influencing career choice behavior, we believe that a STEM internship may serve as a mediating factor between students' initial interest in STEM and their long-term persistence in the STEM workforce.

### **Internship Characteristics**

Founded in 1999, the Community College Internship (CCI) seeks to encourage community college students to enter technical careers relevant to the DOE mission by providing paid technical training experiences at one of 16 participating DOE laboratories/facilities. This DOE Office of Science Workforce Development for Teachers and Scientists program is offered on a national scale, but this study



# NATIONAL LAB INTERNSHIP IMPACTS ON COMMUNITY COLLEGE STUDENT SUCCESS

focused on the CCI program at LBNL, managed by Workforce Development & Education (WD&E) at LBNL. Applications for CCI are solicited annually, and those selected are placed with a Mentor Group at LBNL – research mentors and colleagues – for whom they will work as “interns.” Ideally, in addition to teaching new skills to support intern development from novice to advanced scientists or engineers (Helix et al., 2022), the Mentor Group engages in mentoring practices (e.g., career exploration), as well. During the program, interns spend the majority of their time each week working with their Mentor Group to learn new technical/research skills and apply these to a specific project. Interns also attend mandatory events hosted by WD&E. On the first day of the program, Orientation introduces interns to program elements and resources at LBNL. Intern Check-ins are small group meetings with the program coordinator to discuss intern experiences and address issues. Internship Meetings are opportunities for interns to interact with peers and guest speakers from various disciplines. Interns present their work to members of the LBNL community and other guests at a Poster Session. To the DOE Office of Science Workforce Development for Teachers and Scientists, interns submit written deliverables (e.g., paper, poster) and pre- and post-surveys online. Optional activities include tours; lectures and seminars; networking; and workshops. An exit survey is administered to all CCI interns by WD&E during the final week of their program, to allow program staff to make improvements.

## Methods

### Positionality Statement

The primary author (L.E.C.) is a woman who was born and raised in California, and grew up in a multicultural household in the U.S. with native-born and immigrant parents. Culturally she identifies as American and Middle Eastern. Her previous experiences as a community college student; participating in the CCI program at LBNL; conducting biological research as an undergraduate; and transferring to a California State University were helpful in establishing rapport with study participants. C.L.F. and L.E.C. have 14 and 12 years of experience, respectively, as practitioners working with a suite of internship programs at LBNL. A.M.B. has 27 years of experience working with and studying undergraduate research

## NATIONAL LAB INTERNSHIP IMPACTS ON COMMUNITY COLLEGE STUDENT SUCCESS

experiences for STEM majors, and L.E.C. has worked with A.M.B. on these projects for 7 years.

Researchers E.W.L., J.J.S., and S.V.D. worked with WD&E internships as student assistants or employees. Researchers A.M., A.N.Z., and G.O.M. worked on this project as research assistants.

Collectively, the authors of this work include individuals who identify as men, women, Asian, Black, Hispanic, Latinx, White, and mixed race. At the time of data collection and analysis, this team included undergraduates, post-baccalaureates, graduate students, faculty, and professionals in disciplines related to biology, chemistry, education, mathematics, medicine, physics, and public health.

### Study Population

Our study population, referred to in this study as “CCI alumni,” consists of individuals who participated in (and successfully completed) the CCI program at LBNL between Summer 2009 and Fall 2016 terms. In total, 93 individuals completed the CCI program in this time frame. We collected survey responses from 43 CCI alumni, and conducted interviews with 12 of these individuals. At the time of their participation in CCI at LBNL, their primary academic majors were as follows: 15 (35%) in civil and/or mechanical engineering, 14 (33%) in chemistry, 5 (12%) in biology, 4 (9%) in physics and/or mathematics, 3 (7%) in environmental science, and 2 (5%) in computer science and engineering. Of the CCI alumni represented in this study, 40 (93%) attended one of the California Community Colleges, and the remaining 3 (7%) attended schools in Illinois, Massachusetts, and New York. More than half of the CCI alumni in this study attended one of the following schools, listed in descending order: Contra Costa College, City College of San Francisco, Diablo Valley College, College of Marin, Hartnell College, Ohlone College, and Sacramento City College.

We use the definitions of “science and engineering occupations” (e.g., life scientists, engineers, mathematicians) and “science and engineering-related occupations” (e.g., science teachers, laboratory technicians, laboratory managers) from the National Academies of Sciences, Engineering, and Medicine (2018) and National Science Board (2016) to define “STEM” in this context. Currently, 5 (12%) are graduate students, 36 (84%) have entered the STEM workforce, and 2 (5%) have entered the health

# NATIONAL LAB INTERNSHIP IMPACTS ON COMMUNITY COLLEGE STUDENT SUCCESS

workforce. Additionally, 20 (47%) have completed one or more A.A./A.S. degrees, 41 (95%) have completed one or more B.A./B.S. degrees, 11 (26%) have completed a master’s degree, 9 (21%) have – or have nearly – completed a Ph.D. in STEM, and 2 (5%) have completed a health-related degree (e.g., Ph.D., D.D.S., M.D., M.D.-Ph.D.).

**Table 2**

*Demographic information for all 2009-2016 Community College Internship (CCI) participants at Lawrence Berkeley National Laboratory (LBNL), those who completed a survey, and those who were interviewed*

| Demographics           | CCI full group |     | CCI surveys |     | CCI interviews |     |
|------------------------|----------------|-----|-------------|-----|----------------|-----|
|                        | <i>n</i>       | %   | <i>n</i>    | %   | <i>n</i>       | %   |
| Total                  | 93             | 100 | 43          | 100 | 12             | 100 |
| Gender                 |                |     |             |     |                |     |
| Female                 | 28             | 30  | 18          | 42  | 5              | 42  |
| Male                   | 58             | 62  | 24          | 56  | 7              | 58  |
| Unknown <sup>a</sup>   | 7              | 8   | 1           | 2   | 0              | 0   |
| Ethnicity/race         |                |     |             |     |                |     |
| Asian                  | 22             | 24  | 11          | 26  | 2              | 17  |
| Black                  | 4              | 4   | 0           | 0   | 0              | 0   |
| Hispanic and/or Latinx | 18             | 19  | 9           | 21  | 3              | 25  |
| Two or more races      | 8              | 9   | 2           | 5   | 1              | 8   |
| White                  | 25             | 27  | 17          | 40  | 6              | 50  |
| Unknown <sup>a</sup>   | 16             | 17  | 4           | 9   | 0              | 0   |

*Note.* <sup>a</sup> For both gender and ethnicity/race data, the “unknown” group includes both “decline to state” responses and missing data.

# NATIONAL LAB INTERNSHIP IMPACTS ON COMMUNITY COLLEGE STUDENT SUCCESS

## Data collection

The aforementioned exit survey was administered to CCI participants beginning in 2009, which gave us some baseline information about those elements of the program that were impactful to community college students at the time of their participation. We thus focused our efforts on identifying individuals who participated in the CCI program in 2009 and later. Exit survey responses and published literature about community colleges, internships, and research experiences informed the development of the *Community College Internship (CCI) Alumni Survey* and interview protocol. During recruitment, we found that some email addresses belonging to CCI alumni were missing or inactive, so the remaining CCI alumni were contacted through online platforms such as LinkedIn or Facebook. Consent forms and surveys were administered through Qualtrics. Semi-structured interviews were conducted a) in-person and recorded as audio files with a handheld recorder or b) using Zoom and recorded as both video and audio files. Interviews with participants were between 60 to 90 minutes in length. L.E.C. conducted the interviews, and field notes were taken by L.E.C. and S.V.D. The audio files were then transcribed and checked for accuracy by A.N.Z., E.W.L., G.O.M., J.J.S., L.E.C., and S.V.D. This study was approved by the Institutional Review Board at LBNL (Protocol ID: Pro00023065) with the University of California, Berkeley, as the relying institution (Reliance Registry Study #2593). All contributing researchers have completed training in the responsible and ethical conduct of research involving human subjects, administered through LBNL or the University of California, Berkeley.

## Data analysis

When survey results were first obtained, A.N.Z. and G.O.M. organized open-ended responses into major categories, and these initial themes were used to guide discussions among researchers and with others who possess expertise regarding community college staff, faculty, and students in STEM departments (see “Credibility and trustworthiness” section). Data sets were organized by S.V.D. into individual folders for each study participant, to allow for review of all of the data collected from a particular individual for this study and guide discussions by researchers. Survey responses and interview

## NATIONAL LAB INTERNSHIP IMPACTS ON COMMUNITY COLLEGE STUDENT SUCCESS

transcripts (referred to as “documents”) were analyzed using an approach that combined both grounded theory and content analysis; initial codes were developed based on the aforementioned SCCT framework and literature related to professional development opportunities and research experiences for undergraduates; documents were read in full; sections aligned with the research questions were tagged; certain sections of each document were assigned one or more individual codes; SCCT-related codes that did not appear in our data were removed from the coding scheme, and major themes that identified in multiple documents were kept (Bloomberg & Volpe, 2018; Glaser et al., 1968). See Tables 3, 4, and 5 for the SCCT-related themes. Themes and findings were identified and discussed by all authors, and data representation was refined for accuracy and clarity.

Scholars have called on educational scholars to report on the perspectives of Hispanic/Latinx community college students (NASEM, 2023; Reddy & Siqueiros, 2021; Solorzano et al., 2005). When analyzing our data, we found that some study participants shared unique experiences connected to their **Hispanic and/or Latinx** identities. We acknowledge that the terms “Hispanic” and “Latino/a/x,” do not describe a singular racial, ethnic, or linguistic community (Abrica et al., 2020). To protect the identities of our study participants, we only report an individual’s self-identification as Hispanic or Latinx when that information was disclosed as part of an open-ended survey response or interview. Additionally, we have named the specific identity of one or more study participants when reporting a finding that connects to background, culture, or identity in our writing, instead of referring to a group as “students of color” or “underrepresented minorities” (NASEM, 2023).

### Credibility and trustworthiness

The topic of this study, CCI, is a national program funded by the DOE, and has multiple sites across the U.S. However, this study is focused on the CCI program hosted by one particular DOE national laboratory: LBNL. One benefit of examining the impact of the CCI program on participants who have all completed the program at LBNL is the reduction of institutional variability, as compared to a study comparing CCI across different sites (Jones et al., 2010).

## NATIONAL LAB INTERNSHIP IMPACTS ON COMMUNITY COLLEGE STUDENT SUCCESS

Used in several ways, triangulation was a key aspect of our approach to conducting this study (Golafshani, 2003; Stahl & King, 2020). This study involves multiple data types, allowing us to employ data triangulation (Patton, 1999; Stahl & King, 2020). Our primary method for collecting data was through the collection of survey responses. Conducting in-depth interviews allowed us to more clearly understand the survey responses by asking for clarification, collecting new stories, and allowing us to confirm or refine our initial interpretations of the data. We also used analyst triangulation, in which multiple observers or analysts contribute their expertise to enhance the quality and credibility of our findings (Patton, 1999; Stahl & King, 2020). Over the course of this study, we made use of analyst triangulation in three ways. 1. There is a long history of assessment and evaluation of community colleges by people outside of the community college setting, which prevents those with expertise from contributing to knowledge about this system (e.g., McKinney & Hagedorn, 2017; Ocean et al., 2022). Thus, we consulted with current and previous community college students, community college and university faculty, university advisors who work with transfer students, and STEM professionals who serve as mentors. 2. During the data collection and analysis stages, multiple researchers read and discussed the data and the themes we constructed to present our findings. When interpreting data from a particular study participant or group of study participants, authors with similar backgrounds, lived experiences, or identities were consulted. 3. Over the course of this study, we were in touch with CCI alumni at multiple time points for the purposes of recruitment into the study, scheduling interviews, and member checks to establish transparent relationships and rapport with this group (Chicago Beyond, 2018; Kornbluh, 2015; Patton, 2005; Thomas, 2017). Although CCI alumni shared information about their lives that would eventually become data, we reduced the amount of “transactional” communication. Some CCI alumni reached out to check our progress or update researchers on their academic or career activities. They expressed gratitude for the opportunity to provide their perspectives, excitement for the publication of this work, and hope that it creates opportunities for community college students.

## NATIONAL LAB INTERNSHIP IMPACTS ON COMMUNITY COLLEGE STUDENT SUCCESS

### Limitations

Selection bias is a common critique of studies focusing on the impacts of programs, internships, research experiences, research opportunities, professional development opportunities, etc. In this context, selection bias refers to the scenario in which a student makes the decision to apply to and/or has a greater than average chance of participating in a program as a result of their a) professional network, b) knowledge of its existence, or c) skill level in applying to the program (e.g., experience writing essays, relevant experience on their resume/CV, strong recommendation letters). We recognize selection bias as a potential limitation of this study, and thus cannot claim that participation in the CCI program directly caused the outcomes reported in this study. Instead, we make the case that participation in CCI influenced student perspectives about working in STEM fields, their own abilities and interest in STEM fields, and other related topics, aligned with the SCCT model. Our findings thus center around those outcomes that CCI alumni attribute to their participation in the program.

### Findings

All of the themes we constructed as part of our findings were informed by previous literature about SCCT, higher education, persistence in STEM, and student learning during research experiences and internships. Commentary about connections between our major findings and the SCCT model can be found in Table 5.

### Section 1. Pre-program experiences, supports, and barriers

#### *Support from community college faculty, STEM groups, and peers*

While attending community colleges, the faculty, staff, and student peers at their home institution were a key source of support for CCI alumni. Aligned with recent studies about the supportive social environments at community colleges, 30/43 (70%) of CCI alumni described their positive experiences with small class sizes, community-building activities, and mentorship (Buenaflor, 2023). Some compared

## NATIONAL LAB INTERNSHIP IMPACTS ON COMMUNITY COLLEGE STUDENT SUCCESS

the individualized attention they received at their community colleges with the inaccessibility of faculty at baccalaureate granting institutions after transferring. Although many alumni were originally not planning to apply to any STEM internship or other research opportunity, 21/43 (49%) of CCI alumni reported that they were supported to do so through a “nudge” from community college faculty members, STEM club leaders, program staff, or peers. We conceptualize the “nudge” as strong and deliberate encouragement to pursue a particular opportunity, despite student reservations and/or low self-confidence. They were first introduced to the idea of engaging in professional development opportunities during class, in conversations with peers, or while attending an event hosted by a STEM club. Later, the aforementioned individuals or groups would increase the intensity and complexity of support (e.g., reminders in class, announcements during club meetings, and writing recommendation letters).

Something that helped a lot was the [STEM club] ...That was key for me. Getting in a group with people that were open-minded and willing to connect and doing it together ... You see them again, and again, and again in the same classes, and that was something that was really vital, having that support system there.

... we had instructors that ... had careers in industry or worked at these research centers, so they want to share what they learned ... my instructor told me about CCI ... and said, ‘You know, you’ve got a good shot of getting in. Would you be interested?’

For some CCI alumni, the lack of support from their families to pursue an undergraduate degree in STEM was a barrier to their academic success. 9/43 (21%) of CCI alumni described how this lack of familial support was challenging on an emotional level (e.g., self-doubt, embarrassment), or in terms of their understanding of what steps to take to pass their courses and/or transfer to a baccalaureate granting institution. Several Hispanic/Latinx alumni from rural agricultural communities explained that their upbringing did not prepare them to confidently select a major or obtain professional development



## NATIONAL LAB INTERNSHIP IMPACTS ON COMMUNITY COLLEGE STUDENT SUCCESS

opportunities, but that the social networks at their local community colleges were beneficial in helping them to achieve their goals (Mireles-Rios & Garcia, 2019).

### *Few opportunities for community college students*

Alumni described a variety of goals for wanting to participate in the CCI program, including curiosity about research, a desire to apply the concepts learned in their STEM courses at the community college, or an interest to work on a particular STEM topic (e.g., clean energy, actinide chemistry, HVAC systems). However, 28/43 (65%) of CCI alumni articulated the lack of resources available to community college students. CCI was often described as being “one of the only” programs specifically for community college students, and one in which they were not in competition with students attending baccalaureate granting institutions as applicants.

I’m glad that you’re doing research on this community college program. I think not enough opportunities are made available, or that we’re aware of [as students] ... at [my school], it was unheard of. I know that no one prior to me had done the program.

### ***Lack of knowledge about research, jobs, and careers in STEM fields***

As community college students, 38/43 (88%) of CCI alumni, explained that they had little to no understanding of what it would be like to work in their STEM field of study before the program. Self-described as “clueless,” or having “no idea” about the work involved, many alumni shared stories about the moment when they found out that they had been accepted or in the weeks following. These were often connected to their fears, reservations, or predictions about the program. Others explained that although they had some conceptions of what research scientists do (e.g., biologists use microscopes, physicists use complex equations), they did not understand the goals, processes, or rationale for this work. While attending community college, some individuals enhanced their interest in STEM through

## NATIONAL LAB INTERNSHIP IMPACTS ON COMMUNITY COLLEGE STUDENT SUCCESS

science-themed shows or magazine articles, but in retrospect, they explained that this media did not give them an accurate understanding of working in their STEM discipline.

I was really surprised when I got it ... I'm thinking, I have no idea what optics or x-ray beams are ... I was talking to my chemistry professor, and I was like, "I don't know what I just got myself into!"

### *Low expectations of success in STEM*

After taking some college-level courses in STEM subjects, but before completing the CCI program, 37/43 (86%) of alumni reported low expectations of their success in pursuing a STEM career. Their academic and career goals were vague at this stage. Some explained that they believed they could support themselves with a job, but felt unsure that they could be successful in the STEM workforce. Although all of our study participants applied to and successfully completed the program, 18/43 (42%) of CCI alumni reported their initial low expectations of being admitted, and the belief that most professional development opportunities are meant for students attending baccalaureate granting institutions. Television shows, films, and books produced in the U.S. rarely include depictions of community college students, but inaccurately portray them as "mediocre" and "unmotivated" when they do (Bourke et al., 2008; LaPaglia, 1993; Tucciarone, 2007). Although some CCI alumni previously held misconceptions about community colleges, they did not agree with negative media portrayals of these schools (Hawk & Hill, 2016).

... my mentors told me [about] programs that I should apply to, and felt it was out of my league. Students across the country from top schools were applying, so why should I apply?

I don't know, I feel like a lot of people think, "oh, community college," and have a bad sort of attitude. For me, looking back, that was an incredible decision for me, that completely changed my life.

# NATIONAL LAB INTERNSHIP IMPACTS ON COMMUNITY COLLEGE STUDENT SUCCESS

**Table 3**

*Experiences of Community College Internship (CCI) alumni as community college students taking STEM coursework before their participation in the program at Lawrence Berkeley National Laboratory (LBNL)*

| Theme                                                          | Sub-theme                                                                        | Representative quote                                                                                                                                                                                                                                                                      | %  |
|----------------------------------------------------------------|----------------------------------------------------------------------------------|-------------------------------------------------------------------------------------------------------------------------------------------------------------------------------------------------------------------------------------------------------------------------------------------|----|
| Lack of knowledge and research, jobs, and STEM careers         |                                                                                  | “Before [CCI] I probably had no idea what a research question was ... on a zero to ten scale, before, it would be zero.”                                                                                                                                                                  | 88 |
| Low expectations of success in a STEM career                   |                                                                                  | “... my mentors told me to start applying to internships ... I had developed street smarts, so I had no issues in putting myself [into the] workforce, but when I exposed myself to science, I had uncertainties. I was worried if I’d find gainful employment that would make me happy.” | 86 |
| Support from community college faculty, STEM groups, and peers |                                                                                  | “For me it was a really positive experience ... I had really good professors who, I think, kind of spent a little more one-on-one time with the students. ... I felt like I got to know my professors really well. It’s something I honestly would do all over again.”                    | 70 |
|                                                                | Received a “nudge” from one or more people associated with the community college | “... the professors, the department, they mentioned it in classes, they mentioned this internship. They pushed [us] a little bit, but weren’t twisting everyone’s arm ... they made it really easy for [us] to get the information. Reminders about deadlines and stuff like that.”       | 49 |
|                                                                | Lack of support from family                                                      | “I am from a very traditional sort of community... going to college seemed like a joke [to them] ... without the [STEM club] at my community college, I would not be doing a STEM major. I would not have finished my degree.”                                                            | 21 |
| Few opportunities for community college students               |                                                                                  | “... people at my school, I have noticed that they don’t know about opportunities. When they find out I’ve had internships, they’re shocked! So, I think maybe other students are just going through this path, and they don’t know what else is out there ...”                           | 65 |
| Low expectations of being admitted into CCI                    |                                                                                  | “I initially applied because I was encouraged by my community college mentors. I was extremely reluctant and felt that I did not compare well as a qualified candidate ... Never thinking that I would ever get accepted.”                                                                | 42 |

*Note.* These themes are aligned with the social cognitive career theory (SCCT), and were developed from analysis of both open-ended survey responses and interview data. The proportion of CCI alumni (n=43)

## NATIONAL LAB INTERNSHIP IMPACTS ON COMMUNITY COLLEGE STUDENT SUCCESS

who reported experiences in each category are shown, with representative quotes for that category. Those study participants who completed a survey and an interview were counted only once. Many responses were multi-thematic.

### Figure 1

*Primary reasons for applying to the Community College Internship (CCI) program at Lawrence Berkeley National Laboratory (LBNL), as described by survey respondents through open-ended responses*

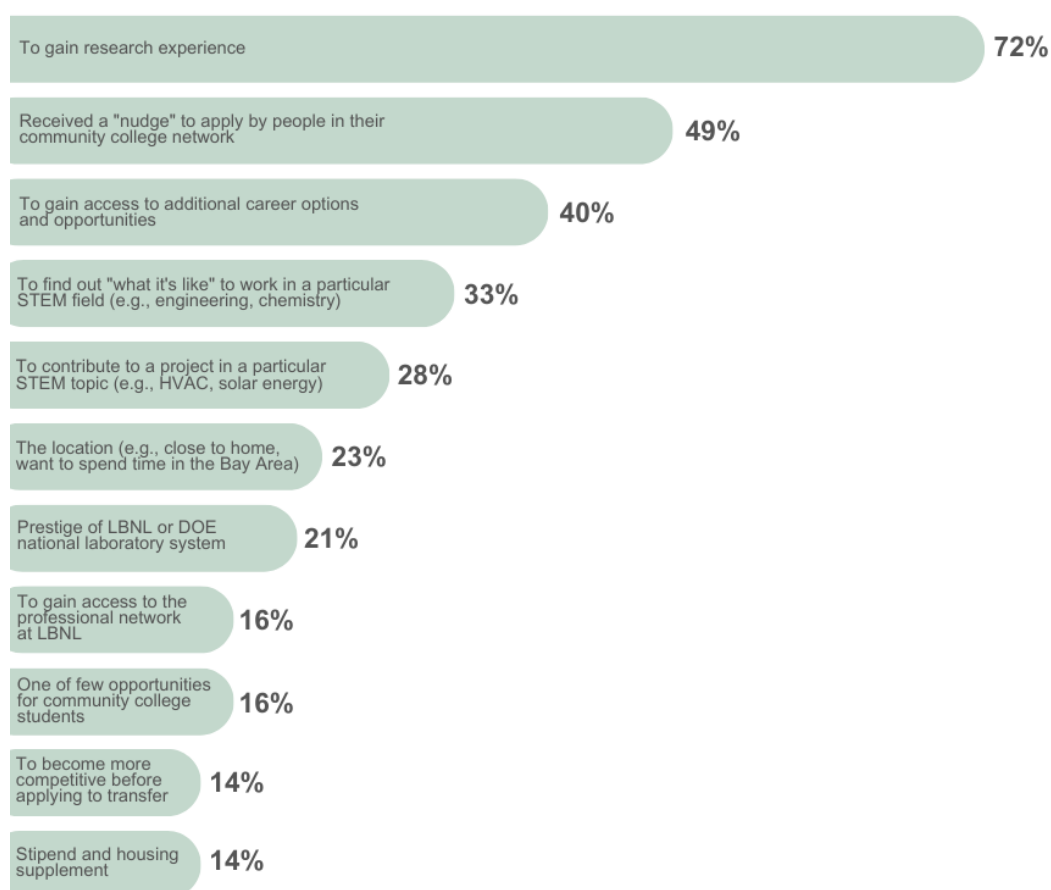

*Note.* Alumni applied to the CCI program between 2008 and 2015, and participated between 2009 and 2016. The percentage of CCI alumni (n=43) who listed each reason are shown. Respondents usually listed more than one reason.

# NATIONAL LAB INTERNSHIP IMPACTS ON COMMUNITY COLLEGE STUDENT SUCCESS

## Section 2. Experiences during and after the CCI program

Shared through open-ended survey responses and interviews, CCI alumni explained what they gained from CCI, and how the program shifted their perspectives about a number of topics. These gains were often contrasted with their perspectives as community college students before CCI, and stood out as being impactful to them years after completing the program.

When I did my interviews for grad school, they asked me a question about internships. The first thing I talked about was my experience at LBNL, talking research projects, collaborating with professionals, problem solving on the spot. When I talk about it, my eyes light up! I'm in the moment, it really gets me excited. They see it, and they notice that, and they feel that, and then they know that I'm being honest and genuine. And they themselves understand that these experiences helped me get to where I am now.

### *Increased self-efficacy, confidence, and STEM identity*

Before the program, including the period of time during which they were preparing their application, many CCI alumni explained that their background and/or lived experiences made it challenging for them to envision someone “like them” being successful at LBNL. However, 36/43 (84%) of CCI alumni reported that they experienced an increase in self-efficacy and/or confidence to work on technical projects and pursue their academic/career goals in STEM after the program. When CCI interns had opportunities to work in ways that pushed them beyond their comfort zone, the process of “getting through” these challenges was useful to their perception of their own capabilities.

... [we] couldn't figure out how to utilize [the] photomultiplier. We tried for over a day to figure out the proper orientation to apply voltage ... It was incredibly frustrating and we were afraid [of looking] stupid ... This moment was key... This experience ... gave me confidence and ignited a

# NATIONAL LAB INTERNSHIP IMPACTS ON COMMUNITY COLLEGE STUDENT SUCCESS

passion for investigational projects.

Some CCI alumni recalled “always” having an interest in STEM, sharing stories from their childhood to illustrate the importance of these subjects in their lives. However, this early interest in STEM did not translate into confidence in their pursuit of a STEM career as community college students. Overall, 30/43 (70%) of CCI alumni reported “feeling like” a scientist or engineer during the program. Aligned with a 2020 study by Trott and colleagues, most CCI alumni attributed an increase in their STEM identity to the novel experiences of being involved in the activities of a scientist or engineer. Some explained that it was meaningful to be paid a stipend by the CCI program, because this legitimized their roles as professionals in training.

When I completed the flow schematics for an entire building, along with my team, and we had all the work in a giant portfolio. It really made us feel like we had completed our first engineering job.

Yeah, just being in the cafeteria during lunch, that's when I felt like a scientist. A strong emotional experience I [had] ... taking the blue buses up to the hill ... made me feel like a scientist every day of the summer program. It was just a phenomenal program that was a morale booster for me ... I love that it felt like home.

# NATIONAL LAB INTERNSHIP IMPACTS ON COMMUNITY COLLEGE STUDENT SUCCESS

**Table 4**

*Most common benefits of participation in the Community College Internship (CCI) program at Lawrence Berkeley National Laboratory (LBNL), as articulated by CCI alumni*

| Theme                                                  | Sub-theme                                                                      | Representative quote                                                                                                                                                                                                                                                                    | %  |
|--------------------------------------------------------|--------------------------------------------------------------------------------|-----------------------------------------------------------------------------------------------------------------------------------------------------------------------------------------------------------------------------------------------------------------------------------------|----|
| Formed a connection with members of the LBNL community |                                                                                | “... I got to meet people in all stages of their careers: grad students, post docs, junior scientists, senior scientists. Conversations with diverse groups of people at each stage helped me figure out what is important to me for my career.”                                        | 95 |
|                                                        | Sustained network after completion of the program                              | “The relationships I cultivated were by far the most important things I took away from the program because they helped [me] create career opportunities elsewhere after I graduated from college.”                                                                                      | 70 |
|                                                        | Experienced kindness from others in the LBNL community                         | “All of the people that I met ... were all kind and supportive. They always helped whenever I would ask for help and didn't make me feel bad that I didn't know certain things ... it [would be] amazing if I ever had the chance to work there as a full-time employee in the future.” | 49 |
|                                                        | Mentor Group supported their project ownership                                 | “I felt especially engaged ... when I designed a cable measurement system that the superconducting magnet group could actually use ...”                                                                                                                                                 | 42 |
| Higher expectations of academic or career success      |                                                                                | “... while doing the internship ... it made me realize that I can go anywhere if I try hard enough. ... I think ‘the sky's the limit’ is a great way of putting what I learned about confidence and ambition.”                                                                          | 91 |
|                                                        | Increased expectations of achieving career goals                               | “It solidified my path to engineering because going into the program I wasn't sure if I fully wanted to pursue this. It's enhanced my perspective if anything, for instance, it made me look forward to completing my degree and being a part of a similar/same team in the future.”    | 86 |
|                                                        | Increased expectations of working in research                                  | “My experience at Berkeley Lab exposed me to life in a research community, which I came to love. It made me realize that I wanted to be involved in research, in some capacity, as a professional.”                                                                                     | 63 |
|                                                        | Increased expectations of graduating from a baccalaureate granting institution | “My experience with the lab made me want to continue to pursue a degree in civil engineering.”                                                                                                                                                                                          | 37 |

# NATIONAL LAB INTERNSHIP IMPACTS ON COMMUNITY COLLEGE STUDENT SUCCESS

|                                                                            |                                                     |                                                                                                                                                                                                                                                                                    |    |
|----------------------------------------------------------------------------|-----------------------------------------------------|------------------------------------------------------------------------------------------------------------------------------------------------------------------------------------------------------------------------------------------------------------------------------------|----|
|                                                                            | Increased expectations of attending graduate school | “My experiences at Berkeley Lab influenced my academic trajectory by [helping to] confirm my desire to attend graduate school in the field that my internship was in and ... [the] letter of recommendation necessary to make that goal a reality.”                                | 35 |
| Learned critical skills                                                    |                                                     | “I like doing hands-on things [more] than sitting in a lecture. It was the hands-on experience, actually getting to do research. You read things from a book, but it’s not the same thing!”                                                                                        | 88 |
|                                                                            | Science communication skills                        | “The scientific writing part had the biggest impact because being able to communicate properly helped me to get my M.S. and helps me every day at work.”                                                                                                                           | 70 |
|                                                                            | Research skills                                     | “Doing research and writing it up had the biggest impact on my career -- doing research to determine the state of things in the field, coming up with a question, coming up with a hypothesis, designing a study to address the question, obtaining data, analyzing the data ... ” | 65 |
|                                                                            | Technical skills                                    | “I learned about cooling systems and ... what the construction and maintenance process is like. I eventually decided to pursue this side of mechanical engineering because I had such an enjoyable experience at the Berkeley lab.”                                                | 63 |
| Increased self-efficacy and/or confidence                                  |                                                     | “I was taught, by my mentor ... to be self-directed ... spend the time to figure it out ... This helped me get a start in industry with confidence because I knew that if I was assigned a task that I didn’t know how to do, I could say: ‘I can figure this out.’ ”              | 84 |
| Increased STEM identity                                                    |                                                     | “Now I feel like a scientist. I feel I’m one of them. I remember coming into CCI and by the time I left, I was part of that club of scientists and researchers ...”                                                                                                                | 70 |
| Increased knowledge about STEM careers (what it’s like and how to succeed) |                                                     | “For sure, I didn’t just gain technical skills, I learned new perspectives ... I learned what a PhD [is], how long does it take, [and] what are the options out there? It wasn’t just how to use a pipette.”                                                                       | 65 |

*Note.* These themes are aligned with the social cognitive career theory (SCCT), and were developed from the analysis of both open-ended survey responses and interview data. The proportion of CCI alumni (n=43) who reported gains in each category are shown, with representative quotes for that category. Those study participants who completed a survey and an interview were counted only once. Many responses were multi-thematic.



## NATIONAL LAB INTERNSHIP IMPACTS ON COMMUNITY COLLEGE STUDENT SUCCESS

### *Received support from and made connections with the LBNL community*

The most commonly reported gain, expressed by 41/43 (95%) of CCI alumni, was having formed connections with members of the LBNL community. These interpersonal interactions were often connected to a deepened understanding of STEM careers, related to the nature of a certain career pathway and/or the knowledge needed to take steps toward a particular career goal. Many CCI alumni shared their emotional response to working alongside people at LBNL who they perceived to be successful, values-driven, and accomplished. Several CCI alumni linked this professional network to their increased confidence in themselves as STEM majors upon returning to school after the program. One individual explained that having conversations with people at LBNL about physics in the cafeteria gave them a “psychological boost” that was useful to them when they went back to school.

It was very awe-inspiring ... There’s all this peripheral learning that goes on. You interact with other scientists. I think it was really wonderful how the program organized all these events, opportunities to talk to different scientists to hear research talks from different scientists ... just being in that environment was very beneficial.

For 30/43 (70%) of CCI alumni, this network was sustained after the completion of the program, leading to direct career benefits, including access to internships, jobs, graduate programs, and research collaborations. Examples of this continued support included receiving advice to inform career decisions; obtaining recommendation letters; new opportunities to collaborate with the team; being introduced to others; and learning about additional academic (e.g., programs, fellowships) or professional (e.g., jobs, internships) opportunities.

During the CCI program, members of the Mentor Group engaged in teaching their interns new technical skills and how to approach problems in their field. Beyond this, 18/43 (42%) of CCI alumni explained that their Mentor Group trusted them to be responsible for some aspect of the CCI project after initial training was complete. These are opportunities to develop “project ownership,” in which students

## NATIONAL LAB INTERNSHIP IMPACTS ON COMMUNITY COLLEGE STUDENT SUCCESS

take an active role in their own learning; become committed to their project; and develop a deep personal connection with the project or work (Wiley, 2009).

The kindness and socioemotional support they received from group members, program staff, and peers during the program was described by 21/43 (49%) of CCI alumni. In most cases, their experience of receiving kindness led to feelings of closeness, pride, engagement, and long-lasting positive feelings about the program and/or members of the LBNL community. Within the larger alumni group, 7/9 (78%) of Hispanic and/or Latinx CCI alumni shared examples of their experiences with kindness during the program. In addition to the aforementioned impacts expressed by other alumni, Hispanic/Latinx alumni shared how the receipt of kindness during CCI had a lasting impact on their impression of LBNL and their desire to work there again in the future.

I worked with a wonderful mentor ... [we] would talk about everything ... marriage, to religion and metaphysical questions, we'd talk about science, basically anything you can imagine! ... [My mentor] was truly a friend.

... [my mentor] told me about the process, that scientists read through the application ... [he] read through mine and said, "I have to meet her" ... I still have that email saved.

### ***Negative experiences with mentor support***

In contrast to the sentiments expressed by most CCI alumni, 5/43 (11%) reported that they did not receive adequate support from their mentors during the program. In previous studies, some common characteristics of inadequate or negative mentorship include those mentors who are “too busy” to provide support, infrequently communicate, are overly critical, or show no interest in student technical or professional development (Cooper et al., 2019; Limeri et al., 2019; Tuma et al., 2021). For three individuals in this study, their mentors communicated with them regularly, they practiced a “hands-off approach,” were not approachable, assigned their interns “menial” tasks, or seemed frustrated when

## NATIONAL LAB INTERNSHIP IMPACTS ON COMMUNITY COLLEGE STUDENT SUCCESS

interns needed assistance. The other two individuals explained that their mentors were not present or available to meet regularly during the internship. Even though their few conversations with their mentor were positive, their overall impression of their working relationship was negative. All five alumni in this group commented on their STEM interest; four were still interested in STEM after the program, but not in the field/topic they worked on during CCI, and the fifth individual was no longer interested in pursuing a career in STEM following the CCI program.

I'm in that lab all day, and you know, [my mentor] is right there ... she wasn't necessarily the easiest person to walk up and tap on the shoulder that often ... She kept it pretty formal ... I didn't want to bug her very much.

I was a little disappointed in the work that was asked of us ... they were utilizing their interns to do the work they did not want to do ... we were only allowed to shadow [LBNL staff] ... never work on a project with them or assist them in any way.

### ***STEM skills, knowledge, and interest level***

As a result of participating in the program, 38/43 (88%) of CCI alumni reported that they learned skills valuable to their professional development. Specifically, 30/43 (70%) reported gains in scientific communication related to the preparation of written technical/research reports and public speaking experience; 28/43 (65%) reported gains in research skills, such as thinking like a scientist, organizing oneself for laboratory work, and analyzing data; and 27/43 (63%) reported gains in technical skills, such as producing drawings in AutoCAD, carrying out laboratory protocols, and learning a new coding language. Some individuals described how these new skills assisted them in their STEM coursework through a deeper understanding of STEM content knowledge or increased confidence when completing assigned projects. One individual learned finite element analysis and how to design a piece of equipment, both useful in their engineering studies and jobs after the program.

## NATIONAL LAB INTERNSHIP IMPACTS ON COMMUNITY COLLEGE STUDENT SUCCESS

Most often through conversations with the Mentor Group or others in the LBNL community, 28/43 (65%) of CCI alumni expanded their knowledge about STEM careers. Some recalled instances where these professionals shared information about being successful and included personal details about their lives. These conversations seem to have been interpreted by alumni as microaffirmations that they too could work at an institution like LBNL (Estrada et al., 2019). Other CCI alumni were interested in learning about how to find a career path aligned with their personal goals and values. Previous work has shown that understanding the scientific and societal context of a project is an important aspect of student learning during science research experiences (Helix et al., 2022). Those committed to the pursuit of a career to “make a difference to people’s lives” may view these interactions as verification that a STEM career will help them to meet this goal (Boucher et al., 2017).

It wasn’t just work, there was that actual mentorship. It wasn’t just like, “we’re splitting cells today,” or cleaning [something]. He was actually like, “this is my background, this is what I do. These are some things you could look into. Have you heard about this program?” ... It wasn’t just work.

STEM is hard. It’s like gymnastics or going to the gym ... It takes dedication ... mentors or professionals that basically look after women in STEM [are important] so that you don’t constantly feel like you’re struggling upstream alone.

After completing the program, 8/43 (19%) of CCI alumni reported that they were less interested in research, or the specific STEM field they were exposed to during CCI. One individual enjoyed working in STEM, but found a lack of alignment between their personal values and the values of those individuals they worked with in the research group. They concluded that they were not interested in working in that field/topic, though they were still interested in joining the STEM workforce. Originally interested in graduate school, another individual became less interested in Ph.D. programs after the CCI program,

## NATIONAL LAB INTERNSHIP IMPACTS ON COMMUNITY COLLEGE STUDENT SUCCESS

because they learned that there are many technical roles available that require less training. Due to the “slow pace” of research, two individuals explained that the program allowed them to make an informed decision not to work in research; one currently works in a health field, and the other works at a DOE national laboratory in STEM in a technical role that does not involve research. A third individual explained that they were less interested in research after CCI, partly because their project was never well-described to them.

### *STEM outcome expectations (during/after CCI); higher expectations of success*

As compared with their experiences prior to participation in the program, 39/43 (91%) of CCI alumni reported an increase in their expectations of success in STEM academic programs and careers. Although alumni possessed a wide variety of career goals, 37/43 (86%) increased, broadened, and/or changed these goals due to participation in the CCI program. In some cases, this change related to the types of work they believed they were capable of doing, while others explained that their goals were “higher” than before. Some explained that they had identified jobs in the STEM workforce that they were interested in, but did not view themselves as potential candidates for these positions until after they participated in the program. Similarly, 27/43 (63%) of CCI alumni explained that the program helped them to maintain or increase their interest in a research-based career. Many CCI alumni explained this new interest in the context of “being exposed” to research, which involved learning about what research entails and gaining experience conducting research in an authentic setting.

I am planning to add in a career step [and study] at the U.S. base in Antarctica. The CCI program really opened up my eyes to the possibilities that I have in which I never [knew] were so close.

As community college students, some (but not all) CCI alumni were certain of their desire to transfer to a baccalaureate granting institution prior to the CCI program. Related to this, 16/43 (37%) of CCI alumni linked their experiences in CCI with a new and/or strengthened desire to obtain a B.A./B.S.

## NATIONAL LAB INTERNSHIP IMPACTS ON COMMUNITY COLLEGE STUDENT SUCCESS

degree. Some individuals explained that their experiences made them more confident in transferring to particular universities or obtaining degrees in disciplines they had not previously considered. For 15/43 (35%) of CCI alumni, the idea of going to graduate school felt more attainable than it had before they participated in CCI, even for those who ultimately made the decision not to apply.

Before I participated in the CCI program, I did not like molecular biology because [of] my previous professor ... my PI and mentor were really helpful in explaining how the concepts of molecular biology were related to the research project. The opportunity changed my major decision.

... before CCI, we were joking about how we were all going to get our Ph.D.s, but after, that was actually an option.

### Section 3. Additional considerations related to background, culture, and identity

In the field of undergraduate STEM education, many scholars have called for researchers to consider the ways in which students' multiple identities can result in unique lived experiences, versus the examination of experiences based solely on a single identity (e.g., Byars-Winston & Rogers, 2019; Ireland et al., 2018). The concept of “intersectionality” was first introduced by Crenshaw as a response to the unique marginalization of Black women, as opposed to the experiences of Black people of any gender, or women of any racial/ethnic background (Crenshaw, 1989; Carbado et al., 2013). Studies exploring intersectionality in STEM have highlighted the value of storytelling in empowering students to share about the ways in which they believe their identities and lived experiences have impacted their STEM trajectory (e.g., Avraamidou, 2020; Isler et al., 2021; Morton & Parsons, 2018; Sparks et al., 2021).

To add context to their academic/career experiences, 16/43 (37%) of CCI alumni shared stories about how their upbringing, group membership, or culture impacted their experiences in STEM. The role of the mentor was a major theme present in both survey and interview data from alumni who

## NATIONAL LAB INTERNSHIP IMPACTS ON COMMUNITY COLLEGE STUDENT SUCCESS

self-identified as part of an “underrepresented” group. Despite being from a “different background,” mentors and staff who deliberately dedicated time to connect with interns about their personal lives were remembered as critical to interns’ positive experiences during CCI. This aligns with the concept of *personalismo* in Hispanic/Latinx culture, which describes how personal relationships are initially valued more than formal/institutional relationships, and critical to building trust (*confianza*) in an educational or professional setting (e.g., Kelley et al., 2020; Mireles-Rios & Garcia, 2019).

Yeah, my mentor was a White man, but for me ... he was truly a friend. [We] would talk about everything, basically anything you can imagine.

[My mentor] would sit you down, and he would tell you anything you wanted to talk about. ... I told him, I feel inadequate. I don’t know what I’m doing really, ... And I remember he gave me a look, like he wasn’t prepared, because typically the interns that he gets, they already had an idea as to what they want to do. ... he was a little surprised and interested ... So, he started talking to me about his private life a little bit, sharing about some of the things he did ... That was really helpful. ... I know he had a lot on his plate, he always did. But, he kept his door open. He literally kept his door open.

### ***Gender***

During interviews, 5/12 (42%) of CCI alumni described how their identity as a woman impacted their academic and professional experiences in STEM and expressed the importance of having access to a “warm” social environment in which they could interact with other women at LBNL during the CCI program. This included peers, mentors, and other staff.

## NATIONAL LAB INTERNSHIP IMPACTS ON COMMUNITY COLLEGE STUDENT SUCCESS

As a student I needed exposure to other STEM students who were equally as excited to do research, and CCI created that space during [group meetings]. Also, I needed [female] mentors since at my community college I was the only minority female in engineering.

Despite professional experience, entry into the STEM workforce, or completion of graduate training, some women shared their long-term struggle with identifying as scientists or engineers. One woman with a STEM graduate degree explained that she has never felt comfortable using these terms to describe herself. However, when asked to compare her role in the scientific community to people she would describe as “scientists,” she could not identify any differences between their professional activities and her own. She was comfortable with being called a “scientist” by non-scientists, but felt hesitant to use the term around others in the lab where she works.

I still struggle with the word “scientist.” That’s not uncommon for women who are doing science. I would definitely say I am still learning. I’m a learner ... I think the thing with [the term] “scientist” is that it feels like a bar so high, it’s something you’re always striving for, where you’re always being very careful about what you’re doing, and reading everything, and being very diligent about marking down what you’ve done ...

### ***First-generation college students***

Some of the alumni we interviewed described how being the first in their family to attend college (first-generation college students) impacted their experiences as undergraduates, and made it more difficult to access professional development opportunities. During interviews, 4/12 (33%) of CCI alumni shared stories in which they connected their status as being first-generation college students with recurring struggles to feel comfortable learning and working in STEM, even after earning undergraduate and graduate degrees in STEM. This group of alumni are diverse in gender, race/ethnicity, and STEM



## NATIONAL LAB INTERNSHIP IMPACTS ON COMMUNITY COLLEGE STUDENT SUCCESS

field of interest. They all made references to the fact that they did not receive advice and/or support from their personal social network when making academic- and career-related decisions.

Being first-generation ... there's no one really before me that can give me tips on how to navigate this world ... At LBNL, I was feeling a little inadequate ... Like, "I shouldn't be in a place like this. There's Nobel Prize winners around! We're developing special bacteria that can eat through plastics, detecting neutrinos, and all this fancy incredible stuff." ... And I'm like, "I'm from a farming community." And I felt that. I told [my mentor], "I feel inadequate."

### *Race and ethnicity*

During interviews, 4/12 (33%) of the CCI alumni shared stories about how their racial or ethnic identities impacted their interpersonal relations with educators and STEM professionals. Some CCI alumni explained that the "diversity problem" in STEM made it challenging for them to envision being successful in STEM long-term. Several Hispanic/Latinx alumni explained how being "the only one" like them and facing racial discrimination led to lower confidence during school and when considering professional development opportunities.

You go into a research facility and you see that there's not too many people that speak like you, ... they're not Latino ... when I went back to school, [I was dealing with] those negative thoughts.

One individual, who is Latino, described their early interest in working as an engineer. However, "those dreams dissipated" when they were repeatedly dismissed by most of their K-12 teachers, and became accustomed to frustration and disappointment in the classroom. Another individual shared how her early educational experiences inspired her to serve as a role model for others who may have experienced discrimination and bias in class and from society. Below she describes microaggressions – "small acts of aggression" that can cause self-doubt and psychological harm to their recipients – which can make

NATIONAL LAB INTERNSHIP IMPACTS ON COMMUNITY COLLEGE STUDENT SUCCESS

students feel as though they have “prove” that they belong in STEM (Camacho & Lord, 2011; Yosso et al., 2009).

I gotta identify myself as Latina ... cultural identity is a part of me, full-time. As a Latina, it’s important for me to represent. There’s not a lot of people like me in this school ... We feel a lot more pressure ... I remember as a young high school student, comments from teachers saying that they were surprised I was doing so well. “You’re a smart Mexican!” You hear that kind of crap ... I don’t want to make it sound like I’m doing something important, because I don’t feel like I’m trying to be special ... But, I am cognizant of the fact that, if I fail, or if I do poorly, I’m making it harder for people like me.

Table 5

*Connections between findings and the Social Cognitive Career Theory (SCCT) model*

| Theme                                    | Sub-theme                                                      | Connection to SCCT model                                                                                                                                                                                                                                                                                                                                                                                                                                                                                                                                                                                                                                                                                                                                                                                                                                                                                                                                                                                                                                                                                                                                                                                                                                                                                      |
|------------------------------------------|----------------------------------------------------------------|---------------------------------------------------------------------------------------------------------------------------------------------------------------------------------------------------------------------------------------------------------------------------------------------------------------------------------------------------------------------------------------------------------------------------------------------------------------------------------------------------------------------------------------------------------------------------------------------------------------------------------------------------------------------------------------------------------------------------------------------------------------------------------------------------------------------------------------------------------------------------------------------------------------------------------------------------------------------------------------------------------------------------------------------------------------------------------------------------------------------------------------------------------------------------------------------------------------------------------------------------------------------------------------------------------------|
| Pre-program social supports and barriers | Support from community college faculty, STEM groups, and peers | We propose that the support students receive from community college faculty, staff, and peers serve as <b>proximal contextual influences</b> in the SCCT model, contributing to their engagement in <b>learning experiences</b> . In practice, students who receive information, advice, and encouragement from the community at their school are <i>more</i> likely to seek out and submit applications to professional development opportunities in their STEM fields of interest. Our data suggest that this can be true even when familial support is lacking and/or has a negative emotional impact on students. Previous studies have categorized familial or other forms of personal support (positive or negative) in the pursuit of extracurricular activities as a <b>background (distal) contextual influence</b> in the SCCT model (Lent, Brown, & Hackett, 2000). We imagine that the nature of an individual student’s relationship with their family or personal network would influence the strength of this familial support on a student’s academic or career decision-making. If a student perceives their family to have credible information and perspectives about STEM careers or regards the opinions of their family to be of utmost importance, familial influence may be stronger. |
| Pre-program social supports and barriers | Few opportunities for community                                | We propose that there are barriers to accessing STEM professional development opportunities for many community college students, which result in the student perspective that there are few opportunities “for them.”                                                                                                                                                                                                                                                                                                                                                                                                                                                                                                                                                                                                                                                                                                                                                                                                                                                                                                                                                                                                                                                                                         |

# NATIONAL LAB INTERNSHIP IMPACTS ON COMMUNITY COLLEGE STUDENT SUCCESS

|                                                                    |                                                                                       |                                                                                                                                                                                                                                                                                                                                                                                                                                                                                                                                                                                                                                                                                                                                                                                                                                                                                                                                                                                                                                                                                                                                                                                                                                                                                                                                                                                                                                                                                                                                                                                                                                                                                                                                                                                                                                                                                                                                                                            |
|--------------------------------------------------------------------|---------------------------------------------------------------------------------------|----------------------------------------------------------------------------------------------------------------------------------------------------------------------------------------------------------------------------------------------------------------------------------------------------------------------------------------------------------------------------------------------------------------------------------------------------------------------------------------------------------------------------------------------------------------------------------------------------------------------------------------------------------------------------------------------------------------------------------------------------------------------------------------------------------------------------------------------------------------------------------------------------------------------------------------------------------------------------------------------------------------------------------------------------------------------------------------------------------------------------------------------------------------------------------------------------------------------------------------------------------------------------------------------------------------------------------------------------------------------------------------------------------------------------------------------------------------------------------------------------------------------------------------------------------------------------------------------------------------------------------------------------------------------------------------------------------------------------------------------------------------------------------------------------------------------------------------------------------------------------------------------------------------------------------------------------------------------------|
|                                                                    | college students                                                                      | These barriers serve as <b>proximal contextual influences</b> in the SCCT model, and can prevent community college students from engaging in <b>learning experiences</b> relevant to their STEM discipline of interest, despite their interest in these experiences.                                                                                                                                                                                                                                                                                                                                                                                                                                                                                                                                                                                                                                                                                                                                                                                                                                                                                                                                                                                                                                                                                                                                                                                                                                                                                                                                                                                                                                                                                                                                                                                                                                                                                                       |
| Pre-program STEM interests and knowledge                           | Lack of knowledge about research, jobs, and careers in STEM fields.                   | Our study participants reported that the learning experiences they engaged in at their community college – typically in the form of STEM coursework – generally did not result in skill development or knowledge about STEM careers. Many studies address the benefits of course-based undergraduate research experiences (CUREs) for STEM majors, but our study participants did not mention engagement in CUREs. Thus, we propose that participation in STEM coursework is not sufficient to a) prepare students in the development of skills relevant to student academic or career goals in STEM, or b) ensure that students understand what scientists, engineers, etc. do while employed in these roles.                                                                                                                                                                                                                                                                                                                                                                                                                                                                                                                                                                                                                                                                                                                                                                                                                                                                                                                                                                                                                                                                                                                                                                                                                                                             |
| Pre-program STEM outcome expectations; low expectations of success | Expectations of success in a STEM career; Expectations of admittance into the program | Regarding their experiences as community college students, our study participants reported having low <b>outcome expectations</b> of success in STEM careers and/or being admitted into the STEM internship program they applied to (i.e., the CCI program). Our data suggest that these low outcome expectations are connected to low <b>confidence</b> as an applicant from a community college, lack of <b>knowledge about STEM careers</b> , and/or unfamiliarity with the concepts and methods used in real-world STEM projects. We propose that low <b>confidence</b> , lack of <b>knowledge about STEM careers</b> , and lack of <b>relevant skills</b> are factors with the capacity to <i>decrease</i> students' <b>outcome expectations</b> in the SCCT model.                                                                                                                                                                                                                                                                                                                                                                                                                                                                                                                                                                                                                                                                                                                                                                                                                                                                                                                                                                                                                                                                                                                                                                                                   |
| Increased self-efficacy, confidence, and STEM identity             | Self-efficacy and confidence; Feeling like a scientist or engineer (STEM identity)    | Although CCI alumni recalled high levels of interest in their STEM field before the program, they also experienced lower confidence levels. In contrast, alumni reported increased <b>self-efficacy, confidence, and STEM identity</b> due to participation in CCI (a <b>learning experience</b> ). This is aligned with previous studies that have applied SCCT to examine the impacts of research experiences on undergraduates' career-related outcomes, in which themes related to self-efficacy appear alongside themes of science identity and confidence (e.g., Frantz et al., 2017). A mediation model by Chemers and colleagues, and the SCCT model indicate that both self-efficacy and science identity mediate the relationship between a research experience and commitment to a science career, while science identity also mediates the relationship between self-efficacy and these intentions to “stay” in STEM (Chemers et al., 2010; Chemers et al., 2011). Although the term “science identity” is frequently used in educational research studies, and generally agreed upon as important to retention and success in STEM fields, there are numerous definitions of this concept. For example, Latinx students have been shown to leverage different types of capital (e.g., social, familial) in the development of STEM identity, which is important to their persistence in STEM (Rincón & Rodriguez, 2021). In both academic and professional settings, the opportunity to demonstrate competence, be recognized by others in the STEM community, present work, and author publications are all factors that support the development of STEM identity for women in STEM (Cabay et al., 2018). Thus, in the SCCT model, we propose that, as a result of participation in a <b>learning experience</b> , levels of <b>self-efficacy, confidence, and STEM identity</b> may increase for community college students who have a positive experience. |

# NATIONAL LAB INTERNSHIP IMPACTS ON COMMUNITY COLLEGE STUDENT SUCCESS

|                              |                                                                                       |                                                                                                                                                                                                                                                                                                                                                                                                                                                                                                                                                                                                                                                                                                                                                                                                                                                                                                                                                                                                                                                                                                                                                                                                                                                                                                                                                                                                                                                                                                                                                                                                                                                                                                  |
|------------------------------|---------------------------------------------------------------------------------------|--------------------------------------------------------------------------------------------------------------------------------------------------------------------------------------------------------------------------------------------------------------------------------------------------------------------------------------------------------------------------------------------------------------------------------------------------------------------------------------------------------------------------------------------------------------------------------------------------------------------------------------------------------------------------------------------------------------------------------------------------------------------------------------------------------------------------------------------------------------------------------------------------------------------------------------------------------------------------------------------------------------------------------------------------------------------------------------------------------------------------------------------------------------------------------------------------------------------------------------------------------------------------------------------------------------------------------------------------------------------------------------------------------------------------------------------------------------------------------------------------------------------------------------------------------------------------------------------------------------------------------------------------------------------------------------------------|
| Social supports and barriers | Received support from and made connections with the LBNL community; Sustained network | <p>As a result of participation in a <b>learning experience</b>, community college students may be introduced to and interact with members of the STEM professional community. We propose that support from and positive interactions with this professional network serve as <b>proximal contextual influences</b> to students in the SCCT model. Some of our data suggest that this support <i>during</i> the learning experience is important to student <b>knowledge about STEM careers</b>. Additionally, this support can enhance students' perceived value of that learning experience, increase their <b>self-efficacy</b> and <b>confidence</b>, and influence their <b>academic and career interests, goals, and actions</b>. During the learning experience, this support will likely be expressed mostly through interpersonal interactions, and conversations about academic/career pathways. <i>After</i> the learning experience, this support will likely be related to providing guidance and assistance to students as they take <b>actions</b> related to their academic/career interests and goals.</p> <p>In practice, students who receive support from members of the STEM professional community are <i>more</i> likely to be aware of relevant opportunities to advance their career, and have access to the resources they need to achieve their goals. This is especially true when that support is <i>sustained</i> following the completion of the learning experience. Mentors may, for example, write recommendation letters, introduce their previous student mentees to others in the professional community, or share information about job opportunities.</p> |
| Social supports and barriers | Mentor Group supported their project ownership                                        | <p>As a result of the support they received from their Mentor Group during CCI, some study participants reported developing feelings of ownership over their assigned project. Comments by CCI alumni about their feelings of project ownership are relevant to this study, as previous work has connected a sense of ownership with student intentions to stay in scientific careers (Corwin et al., 2018; Hanauer et al., 2012). In the SCCT model, this further supports the relationship between <b>proximal contextual influences</b> (during <b>learning experiences</b>) and student <b>academic and career interests, goals, and actions</b>.</p>                                                                                                                                                                                                                                                                                                                                                                                                                                                                                                                                                                                                                                                                                                                                                                                                                                                                                                                                                                                                                                        |
| Social supports and barriers | Experienced kindness from others in the LBNL community                                | <p>Unlike many of the resources needed to offer a professional development opportunity to students, kindness is free and readily available for all members of the STEM professional community to give to others. Although kindness is valued by all types of students, studies have shown that kindness cues in the form of macro- and microaffirmations can contribute to feelings of social inclusion, and persistence in STEM for Black, Hispanic/Latinx, Native American, and low-income students (Estrada, Eroy-Reveles, &amp; Matsui, 2018; Estrada et al., 2019). Two related studies that included more than 2,200 undergraduates majoring in life sciences attending baccalaureate granting institutions found that negative social interactions, feeling excluded or unwelcome, and witnessing unfair treatment – such as favoritism – were factors that led to students wanting to <i>leave</i> their group (Cooper, Gin et al., 2019; Gin et al., 2021). For these students, a positive environment and experiencing kindness led to the opposite result, and they were more likely to <i>stay</i> with their group. Similarly, a study about female undergraduates majoring in engineering found that microaggressions led to feelings of exclusion, frustration, and a desire to limit social interactions; examples included people showing surprise that a woman would study engineering; having to prove to others that they are qualified to be in engineering learning environments; tokenization as one of few women in engineering; and overhearing inappropriate jokes told by colleagues/peers (Camacho &amp; Lord, 2011).</p>                                            |

# NATIONAL LAB INTERNSHIP IMPACTS ON COMMUNITY COLLEGE STUDENT SUCCESS

|                                                                              |                                                                                                                                                                                                 |                                                                                                                                                                                                                                                                                                                                                                                                                                                                                                                                                                                                                                                                                                                                                                                                                                                                                                                                                                                                                                                                                                                                                                                                   |
|------------------------------------------------------------------------------|-------------------------------------------------------------------------------------------------------------------------------------------------------------------------------------------------|---------------------------------------------------------------------------------------------------------------------------------------------------------------------------------------------------------------------------------------------------------------------------------------------------------------------------------------------------------------------------------------------------------------------------------------------------------------------------------------------------------------------------------------------------------------------------------------------------------------------------------------------------------------------------------------------------------------------------------------------------------------------------------------------------------------------------------------------------------------------------------------------------------------------------------------------------------------------------------------------------------------------------------------------------------------------------------------------------------------------------------------------------------------------------------------------------|
|                                                                              |                                                                                                                                                                                                 | <p>In the context of STEM <b>learning experiences</b>, kindness shown to students is likely to increase their access, engagement, participation, and success in STEM careers. Additionally, for students and early career professionals in STEM, the absence of social cues that indicate welcoming, inclusion, and respect from mentors actively decreases engagement, confidence, and persistence in STEM careers (Camacho &amp; Lord, 2011; Karalis Noel et al., 2022). In the SCCT model, this further supports the relationship between <b>proximal contextual influences</b> during <b>learning experiences</b>, student <b>confidence</b>, and their <b>academic and career interests, goals and actions</b>.</p>                                                                                                                                                                                                                                                                                                                                                                                                                                                                          |
| Social supports and barriers                                                 | Negative experiences with mentor support                                                                                                                                                        | <p>We propose that the presence of a STEM professional – whose defined role is to serve in a teaching and mentoring capacity – who does not provide adequate support to their student during a learning experience is a <b>proximal contextual influence</b> that has a negative impact on student <b>academic and career interests</b> in the SCCT model.</p>                                                                                                                                                                                                                                                                                                                                                                                                                                                                                                                                                                                                                                                                                                                                                                                                                                    |
| STEM skills, knowledge, and interest level                                   | Development of critical skills; Increased knowledge about STEM careers                                                                                                                          | <p>As a result of participation in a <b>learning experience</b>, community college students may develop <b>new skills</b> (that they perceive to be beneficial to their academic and professional development) and increase their <b>knowledge about STEM careers</b>. We propose that these gains from the <b>learning experience</b> contribute to the development of student <b>self-efficacy, confidence, STEM identity, and outcome expectations</b> in the SCCT model.</p>                                                                                                                                                                                                                                                                                                                                                                                                                                                                                                                                                                                                                                                                                                                  |
| STEM skills, knowledge, and interest level                                   | Lower interest in research or STEM field/topic                                                                                                                                                  | <p>Our data suggest that there are a variety of reasons why a student's interest level in their STEM field or topic might decrease after completing a learning experience, including the following: not enjoying the nature of the work, having a mentor who provides inadequate support, and finding that their personal values are not aligned with those of the people they work with during the learning experience. These data are aligned with previous studies that have reported that undergraduates can clarify their <b>academic and career goals</b> as a result of participation in <b>learning experiences</b> such as research experiences or internships. In the SCCT model, this <i>may</i> also result in a decreased interest in STEM careers overall (versus a decreased interest in a specific type of work <i>within</i> STEM), but further exploration would be needed to make this connection.</p>                                                                                                                                                                                                                                                                         |
| STEM outcome expectations (during/after CCI); higher expectations of success | Expectations of achieving career goals; Expectations about working in research; Expectations of graduating from a baccalaureate granting institution; Expectations of attending graduate school | <p>We propose that <b>outcome expectations</b> are impacted by the <b>learning experience</b> (including skill development and knowledge about STEM careers), <b>self-efficacy, confidence, and STEM identity</b> (resulting from the learning experience) and <b>proximal contextual influences</b> in the SCCT model. Further, these modified outcome expectations influence student <b>academic and career interests, goals, and actions</b>. With respect to our data, the social support community college students received from the STEM professional community during and after their learning experience contributed to increased outcome expectations of being successful in achieving their career goals, working in research, obtaining a bachelor's degree, and/or attending graduate school. In many cases, CCI alumni articulated their outcome expectations as meaningful to their overall academic and career trajectories, even if their goals related to a different outcome. In other words, a community college student might experience increased outcome expectations related to graduate school, even if they are <i>not</i> interested in pursuing graduate studies.</p> |

# NATIONAL LAB INTERNSHIP IMPACTS ON COMMUNITY COLLEGE STUDENT SUCCESS

Additional considerations related to background, culture, and identity

Background, culture, and identity-related themes; Gender, Race/ethnicity, First-generation to college

We propose that **personal inputs** – such as race/ethnicity, gender, and being first-generation to college – influence community college perspectives and experiences prior to and during a **learning experience**, in the SCCT model. In context, students who identify as members of groups that have been historically excluded from STEM fields – and, as a result, are now underrepresented in the STEM workforce – generally have *less* access to opportunities for professional development, guidance, and support in their pursuit of a STEM degree and/or career.

*Note.* Our findings suggest some modifications of the SCCT model to be more well aligned with the experiences of community college STEM majors engaged in learning experiences (i.e., STEM research experiences and internships).

## Figure 2

*Model of how Social Cognitive Career Theory (SCCT) influences participation in learning experiences and subsequent persistence in STEM fields*

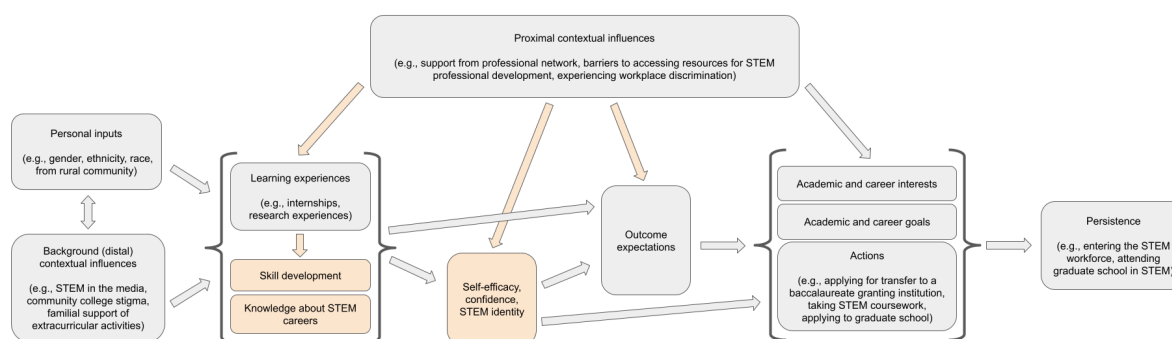

*Note.* This was developed for the current study based on the original model of how basic career interests develop over time (Lent et al., 1994) and later iterations applied to STEM learning experiences for undergraduates (Carpi et al., 2017; Fouad & Santana, 2017). Boxes highlighted in orange were added to previous models, based on data from Community College Internship (CCI) alumni in the current study.



## NATIONAL LAB INTERNSHIP IMPACTS ON COMMUNITY COLLEGE STUDENT SUCCESS

### Discussion

CCI alumni reported that **learning experiences** (including STEM coursework) they engaged with at their community college did not result in **skill development** or **knowledge about STEM careers**, and they had low confidence and outcome expectations. Their stories indicate that perceived barriers (e.g., biases against community college students, few opportunities) act as proximal contextual influences that reduce the likelihood of applying to a learning experience, but support from faculty, STEM clubs, and peers are proximal contextual influences that increase that likelihood. Many CCI alumni received a “nudge” to apply to the program from community college faculty, STEM club leaders, program staff, or peers, which was especially critical for those who experienced discrimination in K-12 educational settings or lacked familial support for their academic goals. The original SCCT model and subsequent iterations did not include a link between **proximal contextual influences** and **learning experiences**, but our data connect these two concepts. In other words, many of the students who participated in the CCI program would have been less likely to apply to the program without the support from their community college network.

Recent studies about the SCCT model suggest an indirect effect of **proximal contextual influences** on goals related to STEM careers through **self-efficacy** and **outcome expectations**, and other potential modifications to the model in its original form (Lent et al., 2018; Sheu et al., 2010). Nearly all of the CCI alumni surveyed reported the two largest gains from participating in a STEM internship as a community college student to be a) the connections they formed with members of the STEM professional community (**proximal contextual influences**) they interacted with during the internship, and b) increased expectations that they would be successful in their academic or professional pursuits (**outcome expectations**). This professional community allowed students to learn more about STEM careers during CCI; supporting them in achieving their goals; and provided kindness – all of which resulted in increased student self-efficacy and confidence. These findings allow us to extend the SCCT model by including a direct link between **proximal contextual influences** and **self-efficacy** and/or **confidence**. Mentors, colleagues, peers, and program staff continued to take actions to provide support in the form of advice,

## NATIONAL LAB INTERNSHIP IMPACTS ON COMMUNITY COLLEGE STUDENT SUCCESS

recommendations, additional internships and jobs, future collaborations, publishing papers together, etc. Those CCI alumni who stayed in contact with the LBNL professional community after the program were regularly reminded of their ability to be successful. These **actions** were thus connected to STEM **persistence**. Additionally, alumni reported that learning new research and/or technical skills and developing proficiency in science communication during CCI were beneficial to their academic and career trajectories and feeling like a scientist or engineer. Previously, the SCCT model did not include **skill development** or **knowledge about STEM careers**, although these are well-known outcomes of professional development opportunities for students. They have been added to the SCCT model in this study, because our data suggest that these are critical to increased **self-efficacy, confidence, identity, and outcome expectations**. Although we understand them to be individual concepts, there are a large number of studies that link **self-efficacy, confidence, and STEM identity** together (e.g., Bottia et al., 2021; Chemers et al., 2011; Frantz et al., 2017; Hernandez et al., 2018; Syed et al., 2019), and our data suggest that all three of these factors are closely related. Thus, we have grouped these three concepts together in our proposed updates to the SCCT model, as applied to community college STEM majors who completed a STEM internship.

Some alumni expressed frustration when they felt like “the only” person from a particular background/identity in a particular group/setting, especially when this situation repeated itself over time. However, those mentors from a different race/ethnicity than their mentees who created space to have conversations about personal topics created feelings of trust and closeness. Aligned with the concept of “authentic care,” our findings indicate that mentors who were perceived to prioritize the care of mentees over project-related outcomes (e.g., finishing tasks, generating data) made a deep and long-lasting impact on their mentees (Valenzuela, 2005). Women who participated in the CCI program reported the benefits of experiencing a “warm” social environment and opportunities to interact with other women. Some Hispanic/Latinx alumni shared stories about the discrimination they experienced from K-12 educators and schools, which negatively influenced their **confidence** to apply to the CCI program and their expectations of success in a STEM career. Combined with knowledge from previous studies about SCCT (e.g., Carpi et



## NATIONAL LAB INTERNSHIP IMPACTS ON COMMUNITY COLLEGE STUDENT SUCCESS

al., 2017; Fouad & Santana, 2017), our data suggest that **personal inputs** (e.g., race/ethnicity, socio-economic status; first-generation to college) play a role in the pursuit of a STEM degree or career, and in their overall perspectives before, during, and after a **learning experience**.

Community college students may be actively exploring and negotiating their relationship to STEM as a career pathway. Thus, a STEM internship has the ability to a) expose them to new academic and career options, b) provide them with the self-efficacy and confidence to succeed, and c) integrate them into the STEM community at a critical time in their undergraduate studies. Our findings reveal that – years after completing the program – students who received quality mentoring and support retained positive memories and associations regarding their experience.

### Recommendations

Many community colleges are disconnected from the STEM professional community and promote employment over professional development opportunities that would support the development of STEM identity in students (Jain et al., 2020; Hewlett, 2018). We recommend that DOE national laboratories engage in outreach efforts that include schools in the surrounding geographic area (Backes & Velez, 2015; Holland Zahner, 2022; Jabbar et al., 2017; Reyes et al., 2019). Our study participants identified harmful stereotypes about community college students and what they can achieve. We recommend that professionals involved in the recruitment, training, and education of community college and transfer students learn about these views and take active steps to empower these students.

In our experience, students attending baccalaureate granting institutions often have more access than community college students' personal statement writing support and research opportunities in faculty labs. Updating the criteria for evaluating program applicants is one way to address the resource disparities across different student populations. Those involved in reviewing applications can consider the potential impact such an opportunity might have for a student with limited access to those opportunities. The Level Playing Field Institute in Oakland, California and the Biology Scholars Program at the University of California, Berkeley consider factors such as “distance traveled.” Rather than previous achievements,

## NATIONAL LAB INTERNSHIP IMPACTS ON COMMUNITY COLLEGE STUDENT SUCCESS

distance traveled examines an applicant's trajectory, including the resources and support they had access to and what hurdles they have overcome to arrive at their current academic/career stage (Craig, 2015; Estrada et al., 2021; Martin & Scott, 2013; Matsui, 2018).

For students and early career professionals, positive and supportive mentor-mentee relationships in a particular professional environment contribute to an increased desire to remain in a similar career pathway (Karalis Noel et al., 2022). Throughout this study, we have reported examples of practices that led to community college students feeling as though they were capable, competent, and prepared to pursue a STEM degree or career. Previous studies about students from groups historically excluded from STEM have reported that a) mentoring relationships are necessary to retain these students in STEM careers, b) these students receive less mentoring overall, c) mentors with a similar background can be effective, but they are often over-burdened, and d) well-intentioned mentors can inadvertently harm these students through practices (e.g., biased selection of applicants, colorblind mentoring) that reproduce inequities faced by these groups in the past (Estrada, Hernandez, & Schultz, 2018; Prunuske et al., 2013; Singleton et al., 2021). Mentors will best serve all students by being aware of the possible ways in which background, culture, and identity can impact students' academic/career experiences and perspectives. Although we often associate professional development opportunities with productivity and career advancement, mentors whose practices also include kindness, attention, and trust can have many positive impacts on their mentees years into the future.

Many CCI alumni commented on the unique opportunity to explore, learn, and work at a DOE national laboratory during their internship. Some found it valuable to collaborate with experts in their field while others reflected on the benefits of having access to specialized research centers and powerful technology. Aligned with the DOE SC "Promising Practices" report, we recommend that DOE national laboratories communicate with program alumni to share information about future opportunities to enter the DOE workforce (DOE SC, 2020).

### **Future work**

## NATIONAL LAB INTERNSHIP IMPACTS ON COMMUNITY COLLEGE STUDENT SUCCESS

We urge more scholars to contribute to knowledge about STEM professional development for community college STEM majors by publishing studies that describe program elements and participant outcomes (Hora et al., 2017; Lucero et al., 2021). Additionally, we hope that faculty and scholars with ties to community colleges will be involved in studies about the experiences of community college students, interventions beneficial to them, and the development of new approaches to support STEM learning and workforce development (De Leone et al., 2019; Hewlett, 2018; Jensen et al., 2020; Schinske et al., 2017). Considering the rare mention of programs at DOE national laboratories in the research literature, we advocate for collaborations between STEM professionals and those with training and expertise in educational research and social sciences to study this topic (Collins, 2023; NASEM, 2023). Scholarship in this area has the potential to influence policy, funding, and the adoption of new ideas for impactful and inclusive learning environments.

### Acknowledgements

We are grateful to Laura Almaguer, Christine Beavers, Christopher Chen, Jerica Duey, Katie Dunne, Brett Heischmidt, Chris Martinez, Melissa Meikle, and Daniel Ramos for supporting the research team during our early development and piloting of the survey and interview protocols. Dianna Bolt, Sean Burns, Chris Byrne, Christel Cantlin, Joseph Crippen, Nakeiah Harrell, Lady Idos, and Christina Teller assisted with records and information. Finally, thanks to Krista Cortes, Ali Esmaili, Max Helix, Megan Hochstrasser, Kelsey Miller, Erin Murphy-Graham, Sinéad Griffin, Lloyd Goldwasser, Kris Gutiérrez, Jennifer King Chen, Ingrid Ockert, Miguel Órdenes, Colette Patt, Christopher Payne, Laura Pryor, Michael Ranney, Angy Stacy, Elisa Stone, Alice Taylor, Matthew Traxler, Karen Villegas, Michelle Wilkerson, Brianna Wright, Rachel Woods-Robinson, Sandra Zuñiga-Ruiz, and the Spring 2022 EDUC 209 class at the University of California, Berkeley for your feedback. L.E.C. would like to acknowledge the role that Rey Morales, Eduardo Cervantes, and Darlene Del Carmen played in “nudging” students (like her) at Gavilan College to apply to professional development opportunities.

# NATIONAL LAB INTERNSHIP IMPACTS ON COMMUNITY COLLEGE STUDENT SUCCESS

## Declaration of Conflicting Interests

No potential conflict of interest was reported by the authors, with respect to the research, authorship, and/or publication of this work.

## Funding

This material is based upon work supported by the National Science Foundation Graduate Research Fellowship Program under Grant No. DGE 1106400; Wheelhouse: The Center for Community College Leadership and Research at the University of California, Davis; Berkeley School of Education Barbara Y. White Fund; and Workforce Development & Education at Lawrence Berkeley National Laboratory.

## Data Availability

Due to the nature of this research, the data collected contains information that could compromise the privacy of research participants. Supporting data will not be openly available in a repository.

## References

Abrica, E. J., Lane, T. B., Zobac, S., & Collins, E. (2020). Sense of belonging and community building within a STEM intervention program: a focus on latino male undergraduates' experiences. *Journal of Hispanic Higher Education*, 1538192720974884. <http://dx.doi.org/10.1177/1538192720974884>

America COMPETES Act of 2022, H.R.4521 - 117th Congress (2021-2022): United States Innovation and Competition Act of 2021. (2022, May 5).

<https://www.congress.gov/bill/117th-congress/house-bill/4521>

American Association of Community Colleges (AACC). (2019). Fact Sheet. Washington, DC. Retrieved from: [https://www.aacc.nche.edu/wp-content/uploads/2019/05/AACC2019FactSheet\\_rev.pdf](https://www.aacc.nche.edu/wp-content/uploads/2019/05/AACC2019FactSheet_rev.pdf)

# NATIONAL LAB INTERNSHIP IMPACTS ON COMMUNITY COLLEGE STUDENT SUCCESS

Anderson, E. L., & Kim, D. (2006). *Increasing the success of minority students in science and technology* (No. 4). American Council on Ed. Retrieved from: <http://hdl.handle.net/10919/86900>

Ashcroft, J., Jaramillo, V., Blatti, J., Guan, S. S. A., Bui, A., Villasenor, V., Adamian, A., Chavira, G., Saetermoe, C., le, E., Horowitz, B., Palacios, B., Williams, P.B., Brockman, E., & Moses, J. (2021). BUILDing Equity in STEM: A Collaborative Undergraduate Research Program to Increase Achievement of Underserved Community College Students. *Scholarship and Practice of Undergraduate Research*, 4(3), 47-58. <http://dx.doi.org/10.18833/spur/4/3/11>

Avraamidou, L. (2020). “I am a young immigrant woman doing physics and on top of that I am Muslim”: Identities, intersections, and negotiations. *Journal of Research in Science Teaching*, 57(3), 311-341. <http://dx.doi.org/10.1002/tea.21593>

Backes, B., & Velez, E. D. (2015). Who transfers and where do they go? Community college students in Florida. *National Center for Analysis of Longitudinal Data in Education Research, Working Paper, 124*. Retrieved from: <https://caldercenter.org/sites/default/files/WP%20126.pdf>

Barajas, J. F., Wehrs, M., To, M., Cruickshanks, L., Urban, R., McKee, A., McKee, A., Gladden, J., Goh, E. B., Brown, M. E., Pierotti, D., Carothers, J. M., Mukhopadhyay, A., Keasling, J. D., Fortman, J. L., Singer, S. W., & Bailey, C. B. (2019). Isolation and Characterization of Bacterial Cellulase Producers for Biomass Deconstruction: A Microbiology Laboratory Course. *Journal of microbiology & biology education*, 20(2), 50. <http://dx.doi.org/10.1128/jmbe.v20i2.1723>

# NATIONAL LAB INTERNSHIP IMPACTS ON COMMUNITY COLLEGE STUDENT SUCCESS

Beshyah, S., Ibrahim, W., Aburawi, E., & Elkhammas, E. (2018). Should lack of ethical committee's approval of human research lead to rejection of resulting manuscripts?. *Ibnosina Journal of Medicine and Biomedical Sciences*, 10(04), 105-107. [http://dx.doi.org/10.4103/ijmbs.ijmbs\\_42\\_18](http://dx.doi.org/10.4103/ijmbs.ijmbs_42_18)

Bloomberg, L. D., & Volpe, M. (2018). Completing your qualitative dissertation: A road map from beginning to end. *SAGE Publications*.

Bottia, M. C., Mickelson, R. A., Jamil, C., Moniz, K., & Barry, L. (2021). Factors Associated With College STEM Participation of Racially Minoritized Students: A Synthesis of Research. *Review of Educational Research*, 91(4), 614-648. <http://dx.doi.org/10.3102/00346543211012751>

Boucher, K. L., Fuesting, M. A., Diekman, A. B., & Murphy, M. C. (2017). Can I work with and help others in this field? How communal goals influence interest and participation in STEM fields. *Frontiers in psychology*, 8, 901. <http://dx.doi.org/10.3389/fpsyg.2017.00901>

Bourke, B., Major, C. H., & Harris, M. S. (2008). Images of fictional community college students. *Community College Journal of Research and Practice*, 33(1), 55-69. <http://dx.doi.org/10.1080/10668920802045535>

Bowen, W. G., Chingos, M. M., & McPherson, M. (2009). Crossing the finish line. In *Crossing the Finish Line*. Princeton University Press.

Brown, S. D., & Lent, R. W. (1996). A social cognitive framework for career choice counseling. *The career development quarterly*, 44(4), 354-366. <http://dx.doi.org/10.1002/j.2161-0045.1996.tb00451.x>

# NATIONAL LAB INTERNSHIP IMPACTS ON COMMUNITY COLLEGE STUDENT SUCCESS

Buenaflor, S. H. (2023). Transfer Student Self-Efficacy: A Success-Oriented Narrative of the Transfer Student Experience. *Community College Journal of Research and Practice*, 47(2), 123-138.

<http://dx.doi.org/10.1080/10668926.2021.1967226>

Burton, G. S., Kennedy, E., & Maria da Graça, H. V. (2019). Results from a 14-Year Intervention Program Designed to Impact Pursuit of a PhD in Research among Underrepresented Students in STEM Disciplines. *Journal for STEM Education Research*, 1-26. <http://dx.doi.org/10.1007/s41979-019-00019-6>

Byars, A. M., & Hackett, G. (1998). Applications of social cognitive theory to the career development of women of color. *Applied and Preventive Psychology*, 7(4), 255-267.

[http://dx.doi.org/10.1016/S0962-1849\(98\)80029-2](http://dx.doi.org/10.1016/S0962-1849(98)80029-2)

Byars-Winston, A., & Rogers, J. G. (2019). Testing intersectionality of race/ethnicity× gender in a social–cognitive career theory model with science identity. *Journal of Counseling Psychology*, 66(1), 30.

<http://dx.doi.org/10.1037/cou0000309>

Cabay, M., Bernstein, B. L., Rivers, M., & Fabert, N. (2018). Chilly climates, balancing acts, and shifting pathways: What happens to women in STEM doctoral programs. *Social Sciences*, 7(2), 23.

<http://dx.doi.org/10.3390/socsci7020023>

Camacho, M. M., & Lord, S. M. (2011, October). "Microaggressions" in engineering education: Climate for Asian, Latina and White women. In *2011 Frontiers in Education Conference (FIE)* (pp. S3H-1). IEEE.

<http://dx.doi.org/10.1109/FIE.2011.6142970>

# NATIONAL LAB INTERNSHIP IMPACTS ON COMMUNITY COLLEGE STUDENT SUCCESS

Carales, V. D., & López, R. M. (2020). Challenging deficit views of Latinx students: A strength-based perspective. *New Directions for Community Colleges*, 2020(190), 103-113.

<http://dx.doi.org/10.1002/cc.20390>

Carbado, D. W., Crenshaw, K. W., Mays, V. M., & Tomlinson, B. (2013). INTERSECTIONALITY: Mapping the Movements of a Theory. *Du Bois review: social science research on race*, 10(2), 303-312.

<http://dx.doi.org/10.1017/S1742058X13000349>

Carpi, A., Ronan, D. M., Falconer, H. M., & Lents, N. H. (2017). Cultivating minority scientists: Undergraduate research increases self-efficacy and career ambitions for underrepresented students in STEM. *Journal of Research in Science Teaching*, 54(2), 169-194. <http://dx.doi.org/10.1002/tea.21341>

Chemers, M. M., Syed, M., Goza, B. K., Zurbriggen, E. L., Bearman, S., Crosby, F. J., & Morgan, E. M. (2010). The role of self-efficacy and identity in mediating the effects of science support programs. *University of California, Santa Cruz, CA, Technical Report*, (5).

Chemers, M. M., Zurbriggen, E. L., Syed, M., Goza, B. K., & Bearman, S. (2011). The role of efficacy and identity in science career commitment among underrepresented minority students. *Journal of Social Issues*, 67(3), 469-491. <http://dx.doi.org/10.1111/j.1540-4560.2011.01710.x>

Chen, X. (2013). STEM Attrition: College Students' Paths into and out of STEM Fields. Statistical Analysis Report. NCES 2014-001. *National Center for Education Statistics*. Retrieved from: <http://ies.ed.gov/pubsearch/pubsinfo.asp?pubid=2014001rev>

Chicago Beyond. (2018). *Why am I always being researched? A guidebook for community organizations, researchers, and funders to help us get from insufficient understanding to more authentic truth*. Retrieved



# NATIONAL LAB INTERNSHIP IMPACTS ON COMMUNITY COLLEGE STUDENT SUCCESS

from: [https://chicagobeyond.org/wp-content/uploads/2019/05/ChicagoBeyond\\_2019Guidebook.pdf](https://chicagobeyond.org/wp-content/uploads/2019/05/ChicagoBeyond_2019Guidebook.pdf)

CHIPS Act of 2022, H.R.4346 - 117th Congress (2021-2022): Chips and Science Act. (2022, August 9).

<https://www.congress.gov/bill/117th-congress/house-bill/4346>

Collins, S. N. (2023, February 14). How Can We Make STEM An Inclusive Space for All?. *The Disruptor*. American Association for the Advancement of Science (AAAS) – Improving Undergraduate STEM Education (IUSE) Retrieved from: <https://www.aaas-iuse.org/how-can-we-make-stem-inclusive/>

Community College Survey of Student Engagement (CCSSE). (2021). Survey of Entering Student Engagement (SENSE). *The University of Texas at Austin*. Retrieved from: <https://www.ccsse.org/sense/survey/nationalbenchmark.cfm>

Complete College America. (2014). *Four-year myth: Make college more affordable. Restore the promise of graduating on time*. ERIC Clearinghouse. Retrieved from: <http://files.eric.ed.gov/fulltext/ED558792.pdf>

Cooper, K. M., Gin, L. E., Akeeh, B., Clark, C. E., Hunter, J. S., Roderick, T. B., Elliott, D. B., Gutierrez, L. A., Mello, R. M., Pfeiffer, L. D., Scott, R. A., Arellano, D., Ramirez, D., Valdez, E. M., Vargas, C., Velarde, K., Zheng, Y., & Brownell, S. E. (2019). Factors that predict life sciences student persistence in undergraduate research experiences. *PLoS One*, 14(8), e0220186. <http://dx.doi.org/10.1371/journal.pone.0220186>

Corwin, L. A., Runyon, C. R., Ghanem, E., Sandy, M., Clark, G., Palmer, G. C., Reichler, S., Rodenbusch, S. E., & Dolan, E. L. (2018). Effects of discovery, iteration, and collaboration in laboratory

# NATIONAL LAB INTERNSHIP IMPACTS ON COMMUNITY COLLEGE STUDENT SUCCESS

courses on undergraduates' research career intentions fully mediated by student ownership. *CBE—Life Sciences Education*, 17(2), ar20. <http://dx.doi.org/10.1187/cbe.17-07-0141>

Craig, R. (2015). Distance traveled: A new metric for colleges and universities. *Forbes*. Retrieved from: <https://www.forbes.com/sites/ryancraig/2015/05/06/distance-traveled-a-new-metric-for-colleges-and-universities/>

Creech, C., Just, J., Hammarlund, S., Rolle, C. E., Gonsar, N. Y., Olson, A., Campbell, N., Mennes, K., Adoradio, C., Sonerol, P., Ewell, S., Mazur, C., Kelly Lane, A., Hewlett, J., & Cotner, S. (2022). Evaluating the Representation of Community Colleges in Biology Education Research Publications following a Call to Action. *CBE—Life Sciences Education*, 21(4), ar67. <http://dx.doi.org/10.1187/cbe.21-09-0249>

Crenshaw, K. (1989). Demarginalizing the Intersection of Race and Sex: A Black Feminist Critique of Antidiscrimination Doctrine, Feminist Theory and Antiracist Politics. In *The University of Chicago Legal Forum* (Vol. 140).

Crisp, G., Carales, V. D., & Núñez, A. M. (2016). Where is the research on community college students?. *Community College Journal of Research and Practice*, 40(9), 767-778. <http://dx.doi.org/10.1080/10668926.2015.1102104>

De Leone, C. J., Price, E., Sabella, M. S., & Van Duzor, A. G. (2019). Developing and sustaining faculty-driven, curriculum-centered partnerships between two-year colleges and four-year institutions. *Journal of college science teaching*, 48(6), 20-33. [http://dx.doi.org/10.2505/4/jcst19\\_048\\_06\\_20](http://dx.doi.org/10.2505/4/jcst19_048_06_20)

# NATIONAL LAB INTERNSHIP IMPACTS ON COMMUNITY COLLEGE STUDENT SUCCESS

Department of Energy (2017). *Annual Report on the State of the DOE National Laboratories*. Retrieved from: <https://energy.gov/downloads/annual-report-state-doe-national-laboratories>

Department of Energy (2022). *Diversity, Equity, Inclusion, & Accessibility (DEIA) Strategic Plan 2022*. Retrieved from: [https://www.energy.gov/sites/default/files/2022-09/DOEDEIAStrategicPlan\\_1.pdf](https://www.energy.gov/sites/default/files/2022-09/DOEDEIAStrategicPlan_1.pdf)

Department of Energy Office of Science (2020). *Summary of DOE Office of Science Recognized Promising Practices for DOE National Laboratory Diversity, Equity, and Inclusion Efforts*. Retrieved from: <https://science.osti.gov/-/media/SW-DEI/pdf/Summary-of-SC-DOE-Laboratory-DEI-Promising-Practices-2020---vpublic.pdf>

Estrada, M., Eroy-Reveles, A., & Matsui, J. (2018). The influence of affirming kindness and community on broadening participation in STEM career pathways. *Social issues and policy review*, 12(1), 258. <http://dx.doi.org/10.1111/sipr.12046>

Estrada, M., Hernandez, P. R., & Schultz, P. W. (2018). A longitudinal study of how quality mentorship and research experience integrate underrepresented minorities into STEM careers. *CBE—Life Sciences Education*, 17(1), ar9. <http://dx.doi.org/10.1187/cbe.17-04-0066>

Estrada, M., Young, G. R., Flores, L., Yu, B., & Matsui, J. (2021). Content and Quality of Science Training Programs Matter: Longitudinal Study of the Biology Scholars Program. *CBE—Life Sciences Education*, 20(3), ar44. <http://dx.doi.org/10.1187/cbe.21-01-0011>

# NATIONAL LAB INTERNSHIP IMPACTS ON COMMUNITY COLLEGE STUDENT SUCCESS

Estrada, M., Young, G. R., Nagy, J., Goldstein, E. J., Ben-Zeev, A., Márquez-Magaña, L., &

Eroy-Reveles, A. (2019). The influence of microaffirmations on undergraduate persistence in science career pathways. *CBE—Life Sciences Education*, 18(3), ar40. <http://dx.doi.org/10.1187/cbe.19-01-0012>

Fouad, N. A., & Santana, M. C. (2017). SCCT and underrepresented populations in STEM fields: Moving the needle. *Journal of Career Assessment*, 25(1), 24-39. <http://dx.doi.org/10.1177/1069072716658324>

Frantz, K. J., Demetrikopoulos, M. K., Britner, S. L., Carruth, L. L., Williams, B. A., Pecore, J. L., DeHaan, R. L., & Goode, C. T. (2017). A comparison of internal dispositions and career trajectories after collaborative versus apprenticed research experiences for undergraduates. *CBE—Life Sciences Education*, 16(1), ar1. <http://dx.doi.org/10.1187/cbe.16-06-0206>

García, H. A., & Garza, T. (2016). Retaining Latino males in community colleges: A structural model explaining sense of belonging through socio-academic integration. *Journal of Applied Research in the Community College*, 23(2), 41-58. Retrieved from: <https://www.ingentaconnect.com/content/montezuma/jarcc/2016/00000023/00000002/art00004>

Gaxiola Serrano, T. J. (2017). “Wait, What Do You Mean by College?” A Critical Race Analysis of Latina/o Students and Their Pathways to Community College. *Community College Journal of Research and Practice*, 41(4-5), 239-252. <http://dx.doi.org/10.1080/10668926.2016.1251362>

Gin, L. E., Clark, C. E., Elliott, D. B., Roderick, T. B., Scott, R. A., Arellano, D., Ramirez, D., Vargas, C., Velarde, K., Aeschliman, A., Avale, S. T., Berkheimer, J., Campos, R., Gerbasi, M., Hughes, S., Roberts, J. A., White, Q. M., Wittekind, E., Zheng, Y., Cooper, K. M., & Brownell, S. E. (2021). An exploration across institution types of undergraduate life sciences student decisions to stay in or leave an

# NATIONAL LAB INTERNSHIP IMPACTS ON COMMUNITY COLLEGE STUDENT SUCCESS

academic-year research experience. *CBE—Life Sciences Education*, 20(3), ar47.

<http://dx.doi.org/10.1187/cbe.21-04-0108>

Glaser, B. G., Strauss, A. L., & Strutzel, E. (1968). The discovery of grounded theory; strategies for qualitative research. *Nursing research*, 17(4), 364. <http://dx.doi.org/10.1097/00006199-196807000-00014>

Golafshani, N. (2003). Understanding reliability and validity in qualitative research. *The qualitative report*, 8(4), 597-607. <http://dx.doi.org/10.46743/2160-3715/2003.1870>

Griffith, A. L. (2010). Persistence of women and minorities in STEM field majors: Is it the school that matters?. *Economics of Education Review*, 29(6), 911-922.

<http://dx.doi.org/10.1016/j.econedurev.2010.06.010>

Hagedorn, L. S., & Purnamasari, A. V. (2012). A realistic look at STEM and the role of community colleges. *Community College Review*, 40(2), 145-164. <http://dx.doi.org/10.1177/0091552112443701>

Hahn, H. A., Meirose, L. C., Turman, H. B., Lawdensky, V. J., Mohr, H. D., & Zimmerman, S. J. (2018, July). Professional Development of Student Engineers Using Design Thinking. In *INCOSE International Symposium* (Vol. 28, No. 1, pp. 260-274). <http://dx.doi.org/10.1002/j.2334-5837.2018.00480.x>

Hampton-Marcell, J., Bryson, T., Larson, J., Childers, T., Pasero, S., Watkins, C., Reed, T., Flucas-Payton, Dorletta., & Papka, M. E. (2023). Leveraging national laboratories to increase Black representation in STEM: recommendations within the Department of Energy. *International Journal of STEM Education*, 10(1), 1-6. <http://dx.doi.org/10.1186/s40594-022-00394-4>

# NATIONAL LAB INTERNSHIP IMPACTS ON COMMUNITY COLLEGE STUDENT SUCCESS

Hanauer, D. I., Frederick, J., Fotinakes, B., & Strobel, S. A. (2012). Linguistic analysis of project ownership for undergraduate research experiences. *CBE—Life Sciences Education*, 11(4), 378-385.  
<http://dx.doi.org/10.1187/cbe.12-04-0043>

Hawk, J. L., & Hill, L. H. (2016). “Hipster freshman”: Popular culture’s portrayal of community college students. *Community College Enterprise*, 22(1), 28-42. Retrieved from:  
<https://home.schoolcraft.edu/cce/22.1.28-42.pdf>

Helix, M. R., Coté, L. E., Stachl, C. N., Linn, M. C., Stone, E. M., & Baranger, A. M. (2022). Measuring integrated understanding of undergraduate chemistry research experiences: assessing oral and written research artifacts. *Chemistry Education Research and Practice*, 23(2), 313-334.  
<http://dx.doi.org/10.1039/D1RP00104C>

Hernandez, P. R., Woodcock, A., Estrada, M., & Schultz, P. W. (2018). Undergraduate research experiences broaden diversity in the scientific workforce. *BioScience*, 68(3), 204-211.  
<http://dx.doi.org/10.1093/biosci/bix163>

Hewlett, J. A. (2018). Broadening participation in undergraduate research experiences (UREs): The expanding role of the community college. *CBE—Life Sciences Education*, 17(3), es9.  
<http://dx.doi.org/10.1187/cbe.17-11-0238>

Hill, C., Corbett, C., & St Rose, A. (2010). *Why so few? Women in science, technology, engineering, and mathematics*. American Association of University Women. 1111 Sixteenth Street NW, Washington, DC 20036.

# NATIONAL LAB INTERNSHIP IMPACTS ON COMMUNITY COLLEGE STUDENT SUCCESS

Holland Zahner, D. G. (2022). Opening the black box of vertical transfer admission: The experiences of community college students in STEM majors. *Community College Journal of Research and Practice*, 1-25. <http://dx.doi.org/10.1080/10668926.2022.2135041>

Hora, M. T., Wolfram, M., & Thompson, S. (2017). What do we know about the impact of internships on student outcomes? Results from a preliminary review of the scholarly and practitioner literatures. *Center for research on college-workforce transitions research brief*, 2, 1-20. Retrieved from: <https://ccwt.wisc.edu/wp-content/uploads/2022/04/CCWT-report-Designing-Internship-Programs.pdf>

Horn, L., & Skomsvold, P. (2011). Community college student outcomes: 1994–2009 (NCES 2012-253). *National Center for Education Statistics*. Retrieved from: <http://hdl.voced.edu.au/10707/214041>

Huang, G., Taddese, N., & Walter, E. (2000). Entry and Persistence of Women and Minorities in College Science and Engineering Education. Research and Development Report. NCES 2000-601. *National Center for Education Statistics*. Retrieved from: <https://files.eric.ed.gov/fulltext/ED566411.pdf>

Ireland, D. T., Freeman, K. E., Winston-Proctor, C. E., DeLaine, K. D., McDonald Lowe, S., & Woodson, K. M. (2018). (Un) hidden figures: A synthesis of research examining the intersectional experiences of Black women and girls in STEM education. *Review of Research in Education*, 42(1), 226-254. <http://dx.doi.org/10.3102/0091732X18759072>

Isler, J. C., Berryman, N. V., Harriot, A., Vilfranc, C. L., Carrington, L. J., & Lee, D. N. (2021). Defining the Flow—Using an Intersectional Scientific Methodology to Construct a VanguardSTEM Hyperspace. *Genealogy*, 5(1), 8. <http://dx.doi.org/10.3390/genealogy5010008>

# NATIONAL LAB INTERNSHIP IMPACTS ON COMMUNITY COLLEGE STUDENT SUCCESS

Jabbar, H., Sánchez, J., & Epstein, E. (2017). Getting from here to there: The role of geography in community college students' transfer decisions. *The Urban Review*, 49, 746-776.

<http://dx.doi.org/10.1007/s11256-017-0420-2>

Jain, D., Melendez, S. N. B., & Herrera, A. R. (2020). *Power to the transfer: Critical race theory and a transfer receptive culture*. Michigan State University Press. <http://dx.doi.org/10.14321/j.ctvs09qkh>

Jensen, M., Hull, K., Hood, S., Lawford, H., Ross, K., Gerrits, R., & Ott, B. (2020). Community College Anatomy and Physiology Education Research: Conducting Research Where It Ought to Be Done. *HAPS Educator*, 24(1), 11-17. <http://dx.doi.org/10.21692/haps.2019.029>

Jones, M. T., Barlow, A. E., & Villarejo, M. (2010). Importance of undergraduate research for minority persistence and achievement in biology. *The Journal of Higher Education*, 81(1), 82-115.

<http://dx.doi.org/10.1080/00221546.2010.11778971>

Judge, J., Lannon, H. J., Stofer, K. A., Matyas, C. J., Lanman, B., Leissing, J. J., Rivera, N., Norton, H., & Hom, B. (2022). Integrated academic, research, and professional experiences for 2-year college students lowered barriers in STEM engagement: A case study in geosciences. *Journal of STEM Outreach*, 1-15.

<http://dx.doi.org/10.15695/jstem/v5i1.03>

Juszkiewicz, J. (2020, July). Trends in Community College Enrollment and Completion Data, Issue 6. *American Association of Community Colleges*. Retrieved from:

<https://files.eric.ed.gov/fulltext/ED610261.pdf>



# NATIONAL LAB INTERNSHIP IMPACTS ON COMMUNITY COLLEGE STUDENT SUCCESS

Karalis Noel, T., Miles, M. L., & Rida, P. (2022). Stressed-Out of STEM: Examining Mentoring Experiences of Women, People of Color, and International Postdocs. *Educational Studies*, 1-23.

<http://dx.doi.org/10.1080/00131946.2022.2051030>

Kelley, E. G., Yarrington, C. D., Calderwood, L., Torrey Sosa, L., & Connors, P. D. (2020). The importance of *personalismo*: Navigating obstacles in recruitment strategies for Spanish speakers in marginalized communities. *Journal of genetic counseling*, 29(3), 391-398.

<http://dx.doi.org/10.1002/jgc4.1240>

Kokkelenberg, E. C., & Sinha, E. (2010). Who succeeds in STEM studies? An analysis of Binghamton University undergraduate students. *Economics of Education Review*, 29(6), 935-946.

<http://dx.doi.org/10.1016/j.econedurev.2010.06.016>

Kolsky, K. L. (2005). Summer school in nuclear and radiochemistry at Brookhaven National Laboratory. *Journal of radioanalytical and nuclear chemistry*, 263(1), 143-149.

<http://dx.doi.org/10.1007/s10967-005-0028-y>

Kornbluh, M. (2015). Combatting challenges to establishing trustworthiness in qualitative research.

*Qualitative research in psychology*, 12(4), 397-414. <http://dx.doi.org/10.1080/14780887.2015.1021941>

Krim, J. S., Coté, L. E., Schwartz, R. S., Stone, E. M., Cleaves, J. J., Barry, K. J., Burgess, W., Buxner, S. R., Gerton, J. M., Horvath, L., Keller, J. M., Lee, S. C., Locke, S. M., & Rebar, B. M. (2019). Models and impacts of science research experiences: A review of the literature of CUREs, UREs, and TREs.

*CBE—Life Sciences Education*, 18(4), ar65. <http://dx.doi.org/10.1187/cbe.19-03-0069>

# NATIONAL LAB INTERNSHIP IMPACTS ON COMMUNITY COLLEGE STUDENT SUCCESS

LaPaglia, N. (1993). (Publication No. 9324981) *Story-tellers: The image of the two-year college in American fiction and in "insider" journals*. [Doctoral dissertation, Northern Illinois University]. ProQuest Dissertations Publishing.

Lent, R. W., & Brown, S. D. (2006). On conceptualizing and assessing social cognitive constructs in career research: A measurement guide. *Journal of career assessment*, 14(1), 12-35.

<http://dx.doi.org/10.1177/1069072705281364>

Lent, R. W., Brown, S. D., & Hackett, G. (1994). Toward a unifying social cognitive theory of career and academic interest, choice, and performance. *Journal of vocational behavior*, 45(1), 79-122.

<http://dx.doi.org/10.1006/jvbe.1994.1027>

Lent, R. W., Brown, S. D., & Hackett, G. (2000). Contextual supports and barriers to career choice: A social cognitive analysis. *Journal of counseling psychology*, 47(1), 36.

<http://dx.doi.org/10.1037/0022-0167.47.1.36>

Lent, R. W., Brown, S. D., Sheu, H. B., Schmidt, J., Brenner, B. R., Gloster, C. S., Wilkins, G., Schmidt, L. C., Lyons, H., & Treistman, D. (2005). Social cognitive predictors of academic interests and goals in engineering: Utility for women and students at historically black universities. *Journal of counseling psychology*, 52(1), 84.

<http://dx.doi.org/10.1037/0022-0167.52.1.84>

Lent, R. W., Sheu, H. B., Miller, M. J., Cusick, M. E., Penn, L. T., & Truong, N. N. (2018). Predictors of science, technology, engineering, and mathematics choice options: A meta-analytic path analysis of the social-cognitive choice model by gender and race/ethnicity. *Journal of counseling psychology*, 65(1), 17.

<http://dx.doi.org/10.1037/cou0000243>

# NATIONAL LAB INTERNSHIP IMPACTS ON COMMUNITY COLLEGE STUDENT SUCCESS

Limeri, L. B., Asif, M. Z., Bridges, B. H., Esparza, D., Tuma, T. T., Sanders, D., Morrison, A. J., Rao, P., Harsh, J. A., Maltese, A. V., & Dolan, E. L. (2019). “Where’s my mentor?!” Characterizing negative mentoring experiences in undergraduate life science research. *CBE—Life Sciences Education*, 18(4), ar61. <http://dx.doi.org/10.1187/cbe.19-02-0036>

Lincoln, D., Pasero, S., & Thompson, R. (2019). Making Future Researchers: Internship Opportunities for Physics Students. *The Physics Teacher*, 57(9), 642-645. <http://dx.doi.org/10.1119/1.5135801>

Linn, M. C., Palmer, E., Baranger, A., Gerard, E., & Stone, E. (2015). Undergraduate research experiences: impacts and opportunities. *Science*, 347(6222), 1261757. <http://dx.doi.org/10.1126/science.1261757>

Lucero, J. E., Gallego, S., Hedgepeth, C., & Sanders, D. (2021). Structure and Characteristics for Successful Outcomes: A Review of Community College Internships Programs. *Community College Journal of Research and Practice*, 45(2), 103-116. <http://dx.doi.org/10.1080/10668926.2019.1647901>

Martin, A., & Scott, A. (2013). *Engaging Underrepresented Students in Computer Science: Examining the Effectiveness of a 5-week Computer Science Course in the SMASH Summer Academy*. The Steering Committee of The World Congress in Computer Science, Computer Engineering and Applied Computing (WorldComp). Retrieved from: [https://www.smash.org/wp-content/uploads/2013/08/examining\\_the\\_effectiveness\\_of\\_a\\_5-week\\_computer\\_science\\_course\\_in\\_smash-2.pdf](https://www.smash.org/wp-content/uploads/2013/08/examining_the_effectiveness_of_a_5-week_computer_science_course_in_smash-2.pdf)

Martin, J. P., Stefl, S. K., Cain, L. W., & Pfirman, A. L. (2020). Understanding first-generation undergraduate engineering students’ entry and persistence through social capital theory. *International Journal of STEM Education*, 7(1), 1-22. <http://dx.doi.org/10.1186/s40594-020-00237-0>

# NATIONAL LAB INTERNSHIP IMPACTS ON COMMUNITY COLLEGE STUDENT SUCCESS

Matsui, J. T. (2018). “Outsiders at the table”—diversity lessons from the Biology Scholars Program at the University of California, Berkeley. *CBE—Life Sciences Education*, 17(3), es11.

<http://dx.doi.org/10.1187/cbe.17-12-0276>

McKinney, L., & Hagedorn, L. S. (2017). Performance-based funding for community colleges: Are colleges disadvantaged by serving the most disadvantaged students?. *The Journal of Higher Education*, 88(2), 159-182. <http://dx.doi.org/10.1080/00221546.2016.1243948>

Mireles-Rios, R., & Garcia, N. M. (2019). What would your ideal graduate mentoring program look like?: Latina/o student success in higher education. *Journal of Latinos and Education*, 18(4), 376-386.

<http://dx.doi.org/10.1080/15348431.2018.1447937>

Mooney, G. M., & Foley, D. J. (2011). *Community colleges: Playing an important role in the education of science, engineering, and health graduates* (NSF 11-317). *InfoBrief*. Retrieved from:

<http://www.nsf.gov/statistics/infbrief/nsf11317/nsf11317.pdf>

Morton, T. R., & Parsons, E. C. (2018). #BlackGirlMagic: The identity conceptualization of Black women in undergraduate STEM education. *Science Education*, 102(6), 1363-1393.

<http://dx.doi.org/10.1002/sce.21477>

National Academies of Sciences, Engineering, and Medicine (NASEM). (2017). *Undergraduate Research Experiences for STEM Students: Successes, Challenges, and Opportunities*. National Academies Press.

<https://doi.org/10.17226/24622>

# NATIONAL LAB INTERNSHIP IMPACTS ON COMMUNITY COLLEGE STUDENT SUCCESS

National Academies of Sciences, Engineering, and Medicine (NASEM). (2023). *Advancing Antiracism, Diversity, and Equity Inclusion in STEMM Organizations: Beyond Broadening Participation*. National Academies Press. <https://doi.org/10.17226/26803>

National Center for Education Statistics (NCES). (2019). Digest of Education Statistics for 2019. *U.S. Department of Health, Education, and Welfare, Education Division*.

National Center for Science and Engineering Statistics. (2021). *Women, Minorities, and Persons with Disabilities in Science and Engineering: 2021*. Special Report NSF 21-321. Alexandria, VA: National Science Foundation. Retrieved from: <https://nces.nsf.gov/wmpd>

National Science Foundation (NSF). (2012). *Women, minorities, and persons with disabilities in science and engineering: 2011*. Retrieved from: <http://www.nsf.gov/statistics/wmpd/pdf/nsf11309.pdf>

Nerio, R., Webber, A., MacLachlan, E., Lopatto, D., & Caplan, A. J. (2019). One-Year Research Experience for Associate's Degree Students Impacts Graduation, STEM Retention, and Transfer Patterns. *CBE—Life Sciences Education*, 18(2), ar25. <http://dx.doi.org/10.1187/cbe.19-02-0042>

Newman, L., Wagner, M., Knokey, A. M., Marder, C., Nagle, K., Shaver, D., & Wei, X. (2011). The Post-High School Outcomes of Young Adults with Disabilities up to 8 Years after High School: A Report from the National Longitudinal Transition Study-2 (NLTS2). NCSER 2011-3005. *National Center for Special Education Research*. Retrieved from: <https://ies.ed.gov/ncser/pubs/20113005/pdf/20113005.pdf>

Ocean, M., McLaughlin, J., & Hodes, J. (2022). “We Take EVERYONE”: Perceptions of External Assessment and Accountability at the Community College. *Community College Journal of Research and Practice*, 46(4), 223-239. <http://dx.doi.org/10.1080/10668926.2020.1841041>

# NATIONAL LAB INTERNSHIP IMPACTS ON COMMUNITY COLLEGE STUDENT SUCCESS

Ornelas, A., & Solorzano, D. G. (2004). Transfer conditions of Latina/o community college students: A single institution case study. *Community College Journal of Research and Practice*, 28(3), 233-248.

<http://dx.doi.org/10.1080/10668920490256417>

Patton M. Q. (1999). Enhancing the quality and credibility of qualitative analysis. *Health services research*, 34(5 Pt 2), 1189–1208. Retrieved from:

<https://www.ncbi.nlm.nih.gov/pmc/articles/PMC1089059/>

Patton, M. Q. (2005). Qualitative research. *Encyclopedia of statistics in behavioral science*.

<https://doi.org/10.1002/0470013192.bsa514>

President's Council of Advisors on Science and Technology (2012). *Engage to Excel: Producing One Million Additional College Graduates with Degrees in Science, Technology, Engineering, and Mathematics*. Retrieved from:

[https://obamawhitehouse.archives.gov/sites/default/files/microsites/ostp/pcast-engage-to-excel-final\\_2-25-12.pdf](https://obamawhitehouse.archives.gov/sites/default/files/microsites/ostp/pcast-engage-to-excel-final_2-25-12.pdf)

President's Council of Advisors on Science and Technology. (2021). Industries of the future institutes: a new model for American Science and Technology Leadership. Retrieved from:

[https://science.osti.gov/-/media/\\_/pdf/about/pcast/202012/PCAST---IOTFI-FINAL-Report.pdf](https://science.osti.gov/-/media/_/pdf/about/pcast/202012/PCAST---IOTFI-FINAL-Report.pdf)

Provasnik, S., & Planty, M. (2008). Community Colleges: Special Supplement to The Condition of Education 2008. Statistical Analysis Report. NCES 2008-033. *National Center for Education Statistics*.

Retrieved from: <https://files.eric.ed.gov/fulltext/ED502349.pdf>

# NATIONAL LAB INTERNSHIP IMPACTS ON COMMUNITY COLLEGE STUDENT SUCCESS

Prunuske, A. J., Wilson, J., Walls, M., & Clarke, B. (2013). Experiences of mentors training underrepresented undergraduates in the research laboratory. *CBE—Life Sciences Education*, 12(3), 403-409. <http://dx.doi.org/10.1187/cbe.13-02-0043>

Radwin, D., Wine, J., Siegel, P., & Bryan, M. (2013). 2011-12 National Postsecondary Student Aid Study (NPSAS: 12): Student Financial Aid Estimates for 2011-12. First Look. NCES 2013-165. *National Center for Education Statistics*. Retrieved from: <http://files.eric.ed.gov/fulltext/ED544184.pdf>

Reddy, V., & Siqueiros, M. (2021). The state of higher education for Latinx Californians. *Campaign for College Opportunity*. Retrieved March 29, 2022, from <https://collegecampaign.org/wp-content/uploads/2021/11/FINAL-SHE-Latinx-web.pdf>

Reed, K. (2020). *Investigating Exclusionary Discipline: Teachers, Deficit Thinking, and Root Cause Analysis* (Publication No. 3820) [Doctoral dissertation, Loyola University Chicago]. Educational Psychology Commons. Retrieved from: [https://ecommons.luc.edu/luc\\_diss/3820/](https://ecommons.luc.edu/luc_diss/3820/)

Reyes, M., Dache-Gerbino, A., Rios-Aguilar, C., Gonzalez-Canche, M., & Deil-Amen, R. (2019). The “geography of opportunity” in community colleges: The role of the local labor market in students’ decisions to persist and succeed. *Community College Review*, 47(1), 31-52. <http://dx.doi.org/10.1177/0091552118818321>

Rincón, B. E., & Rodriguez, S. (2021). Latinx students charting their own STEM pathways: How community cultural wealth informs their STEM identities. *Journal of Hispanic Higher Education*, 20(2), 149-163. <http://dx.doi.org/10.1177/1538192720968276>

# NATIONAL LAB INTERNSHIP IMPACTS ON COMMUNITY COLLEGE STUDENT SUCCESS

Rippy, K., & Joseph, W. (2022). Building a Diverse and Inclusive STEM Workforce: The JUMP into STEM Program. In *Proceedings of the American Solar Energy Society National Conference* (pp. 271-274). Springer International Publishing. [https://doi.org/10.1007/978-3-031-08786-8\\_28](https://doi.org/10.1007/978-3-031-08786-8_28)

Russell, S. (2011). Summer Research Opportunities Valuable to Science and Engineering Students. *Pursuit-The Journal of Undergraduate Research at The University of Tennessee*, 3(1), 10. Retrieved from: <https://trace.tennessee.edu/pursuit/vol3/iss1/10>

Russell, S. H., Hancock, M. P., & McCullough, J. (2007). Benefits of undergraduate research experiences. *Science*, 316(5824), 548-549. <http://dx.doi.org/10.1126/science.1140384>

Sahyun, S. C., Polak, J. M., & Moore, C. J. (2006). Undergraduate student laboratory experience at the Synchrotron Radiation Center. *American journal of physics*, 74(11), 987-991. <http://dx.doi.org/10.1119/1.2335474>

Sansing-Helton, B., Coover, G., & Benton Jr, C. E. (2021, June). Increasing STEM Transfer Readiness Among Underrepresented Minoritized Two-Year College Students: Examining Course-Taking Patterns, Experiences, and Interventions. In *Frontiers in Education* (Vol. 6, p. 667091). Frontiers Media SA. <http://dx.doi.org/10.3389/educ.2021.667091>

Schinske, J. N., Balke, V. L., Bangera, M. G., Bonney, K. M., Brownell, S. E., Carter, R. S., Curran-Everett, D., Dolan, E. L., Elliott, S. L., Fletcher, L., Gonzalez, B., Gorga, J. J., Hewlett, J. A., Kiser, S. L., McFarland, J. L., Misra, A., Nenortas, A., Ngeve, S. M., Pape-Lindstrom, P. A., Seidel, S. B., Tuthill, M. C., Yin, Y., & Corwin, L. A. (2017). Broadening Participation in Biology Education Research: Engaging Community College Students and Faculty. *CBE—Life Sciences Education*, 16(2). <http://dx.doi.org/10.1187/cbe.16-10-0289>



# NATIONAL LAB INTERNSHIP IMPACTS ON COMMUNITY COLLEGE STUDENT SUCCESS

Shaw, E. J., & Barbuti, S. (2010). Patterns of persistence in intended college major with a focus on STEM majors. *NACADA*, 30(2), 19-34. <http://dx.doi.org/10.12930/0271-9517-30.2.19>

Sheu, H. B., Lent, R. W., Brown, S. D., Miller, M. J., Hennessy, K. D., & Duffy, R. D. (2010). Testing the choice model of social cognitive career theory across Holland themes: A meta-analytic path analysis. *Journal of Vocational Behavior*, 76(2), 252-264. <http://dx.doi.org/10.1016/j.jvb.2009.10.015>

Singleton, K. S., Tesfaye, R., Dominguez, E. N., & Dukes, A. J. (2021). An open letter to past, current and future mentors of Black neuroscientists. *Nature Reviews Neuroscience*, 22(2), 71-72. <http://dx.doi.org/10.1038/s41583-020-00421-9>

Sólorzano, D. G., Villalpando, O., & Oseguera, L. (2005). Educational inequities and Latina/o undergraduate students in the United States: A critical race analysis of their educational progress. *Journal of Hispanic higher education*, 4(3), 272-294. <http://dx.doi.org/10.1177/1538192705276550>

Sparks, D. M., Przymus, S. D., Silveus, A., De La Fuente, Y., & Cartmill, C. (2021). Navigating the intersectionality of race/ethnicity, culture, and gender identity as an aspiring Latina STEM student. *Journal of Latinos and Education*, 1-17. <http://dx.doi.org/10.1080/15348431.2021.1958332>

Stahl, N. A., & King, J. R. (2020). Expanding approaches for research: Understanding and using trustworthiness in qualitative research. *Journal of Developmental Education*, 44(1), 26-28. <https://www.jstor.org/stable/45381095>

Stanton, J. D., Means, D. R., Babatola, O., Osondu, C., Oni, O., & Mekonnen, B. (2022). Drawing on Internal Strengths and Creating Spaces for Growth: How Black Science Majors Navigate the Racial

# NATIONAL LAB INTERNSHIP IMPACTS ON COMMUNITY COLLEGE STUDENT SUCCESS

Climate at a Predominantly White Institution to Succeed. *CBE—Life Sciences Education*, 21(1), ar3.

<http://dx.doi.org/10.1187/cbe.21-02-0049>

Stofer, K. A., Chandler, J. W., Insalaco, S., Matyas, C., Lannon, H. J., Judge, J., Lanman, B., Hom, B., & Norton, H. (2021). Two-Year College Students Report Multiple Benefits From Participation in an Integrated Geoscience Research, Coursework, and Outreach Internship Program. *Community College Review*, 49(4), 457-482. <http://dx.doi.org/10.1177/00915521211026682>

Taber, K. S. (2014). Ethical considerations of chemistry education research involving ‘human subjects’. *Chemistry Education Research and Practice*, 15(2), 109-113. <http://dx.doi.org/10.1039/C4RP90003K>

Taylor, J. L., & Jain, D. (2017). The multiple dimensions of transfer: Examining the transfer function in American higher education. *Community College Review*, 45(4), 273-293. <http://dx.doi.org/10.1177/0091552117725177>

Thomas, D. R. (2017). Feedback from research participants: are member checks useful in qualitative research?. *Qualitative research in psychology*, 14(1), 23-41. <http://dx.doi.org/10.1080/14780887.2016.1219435>

Thompson, M. N., Perez-Chavez, J., & Fetter, A. (2021). Internship experiences among college students attending an HBC: a longitudinal grounded theory exploration. *Journal of Career Assessment*, 29(4), 589-607. <http://dx.doi.org/10.1177/1069072721992758>

Townsend, B. K. (2001). Redefining the community college transfer mission. *Community college review*, 29(2), 29-42. <http://dx.doi.org/10.1177/009155210102900203>

# NATIONAL LAB INTERNSHIP IMPACTS ON COMMUNITY COLLEGE STUDENT SUCCESS

Townsend, B. K., & Dever, J. T. (1999). What Do We Know About Reverse Transfer Students?. *New directions for community colleges*, 106, 5-14. <http://dx.doi.org/10.1002/cc.10601>

Trott, C. D., Sample McMeeking, L. B., Bowker, C. L., & Boyd, K. J. (2020). Exploring the long-term academic and career impacts of undergraduate research in geoscience: A case study. *Journal of Geoscience Education*, 68(1), 65-79. <http://dx.doi.org/10.1080/10899995.2019.1591146>

Tsapogas, J. (2004). *The role of community colleges in the education of recent science and engineering graduates* (NSF 04-315). *InfoBrief*. Arlington, VA: Division of Science Resources Statistics, National Science Foundation. Retrieved from: <https://wayback.archive-it.org/5902/20150627182834/http://www.nsf.gov/statistics/infbrief/nsf04315/>

Tucciarone, K. M. (2007). Community college image-by Hollywood. *The Community College Enterprise*, 13(1), 37-53. Retrieved from: <http://www.schoolcraft.edu/pdfs/cce/13.1.37-53.pdf>

Tuma, T. T., Adams, J. D., Hultquist, B. C., & Dolan, E. L. (2021). The dark side of development: a systems characterization of the negative mentoring experiences of doctoral students. *CBE—Life Sciences Education*, 20(2), ar16. <http://dx.doi.org/10.1187/cbe.20-10-0231>

Tuthill, M. C., & Berestecky, J. M. (2017). Integrating Undergraduate Research at Two-Year Colleges. *Journal of College Science Teaching*, 46(4). Retrieved from: [https://my.nsta.org/resource/?id=10.2505/4/jcst17\\_046\\_04\\_12](https://my.nsta.org/resource/?id=10.2505/4/jcst17_046_04_12)

Valenzuela, A. (2005). Subtractive schooling, caring relations, and social capital in the schooling of US-Mexican youth. *Beyond silenced voices: Class, race, and gender in United States schools*, 83-94. State University of New York Press.

# NATIONAL LAB INTERNSHIP IMPACTS ON COMMUNITY COLLEGE STUDENT SUCCESS

Varty, A. K. (2022). Promoting achievement for community college STEM students through equity-minded practices. *CBE—Life Sciences Education*, 21(2), ar25.

<http://dx.doi.org/10.1187/cbe.21-09-0237>

Walker, K. L. (2011). Deficit thinking and the effective teacher. *Education and Urban Society*, 43(5), 576-597. <http://dx.doi.org/10.1177/0013124510380721>

Wiley, J. (2009). *Student ownership of learning: an analysis*. (Publication No. 1471761) [Doctoral dissertation, University of Hawai'i at Manoa] ProQuest Dissertations Publishing.

Wise-West, T., Isaacson, M., Graham, Z., & Hornstein, M. (2013, October). Sustainable energy engineering internships for community college and high school students. In *2013 IEEE Frontiers in Education Conference (FIE)* (pp. 1745-1747). IEEE. <http://dx.doi.org/10.1109/FIE.2013.6685136>

Wurstner, S., Herr, C., Andrews, G., & Alley, K. F. (2005). Teacher/scientist partnership develops a simulated natural disaster scenario to enhance student learning. *Journal of Geoscience Education*, 53(5), 522-530. <http://dx.doi.org/10.5408/1089-9995-53.5.522>

Yosso, T., Smith, W., Ceja, M., & Solórzano, D. (2009). Critical race theory, racial microaggressions, and campus racial climate for Latina/o undergraduates. *Harvard Educational Review*, 79(4), 659-691. <http://dx.doi.org/10.17763/haer.79.4.m6867014157m7071>
